# Supplementary material for: Lanthanide cryptate monometallic coordination complexes
Source: Royal Society of Chemistry journal article supplement (doi:10.1039/d0dt02448a), 2020-01-01
Supplement: d0dt02448a1.pdf [file d0dt02448a1.pdf]

# Supporting Information

## For

### Lanthanide cryptate monometallic coordination complexes

Christian D. Buch, Dmitri Mitcov and Stergios Piligkos

Department of Chemistry, University of Copenhagen, Universitetsparken 5, DK-2100 Copenhagen  
(Denmark)

E-mail: [christian.buch@chem.ku.dk](mailto:christian.buch@chem.ku.dk), [piligkos@chem.ku.dk](mailto:piligkos@chem.ku.dk)

#### Contents

|                                                       |    |
|-------------------------------------------------------|----|
| Supporting Information.....                           | 1  |
| For.....                                              | 1  |
| Lanthanide cryptate Single-molecule magnets .....     | 1  |
| Infrared spectroscopy .....                           | 2  |
| Powder X-ray diffraction .....                        | 9  |
| NMR spectra .....                                     | 11 |
| Mass spectra .....                                    | 13 |
| Variable-temperature-variable-field measurements..... | 19 |
| Modelling using only diagonal terms.....              | 25 |
| Crystal field parameters .....                        | 31 |
| Ac susceptibility.....                                | 38 |
| Preparation from MeCN .....                           | 53 |

# Infrared spectroscopy

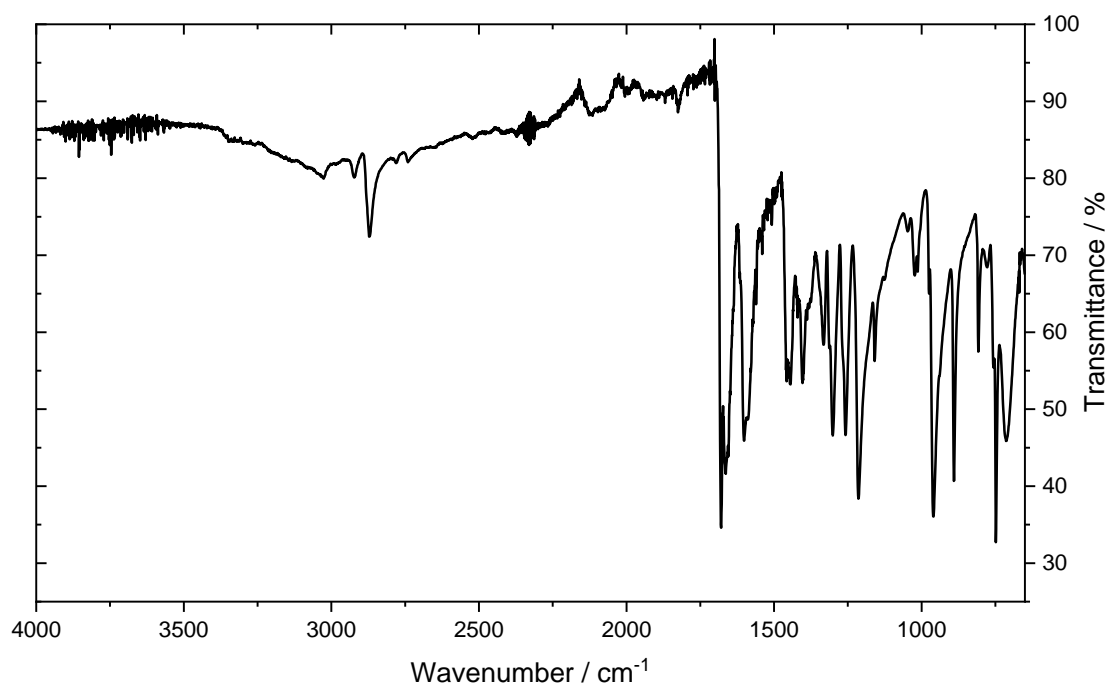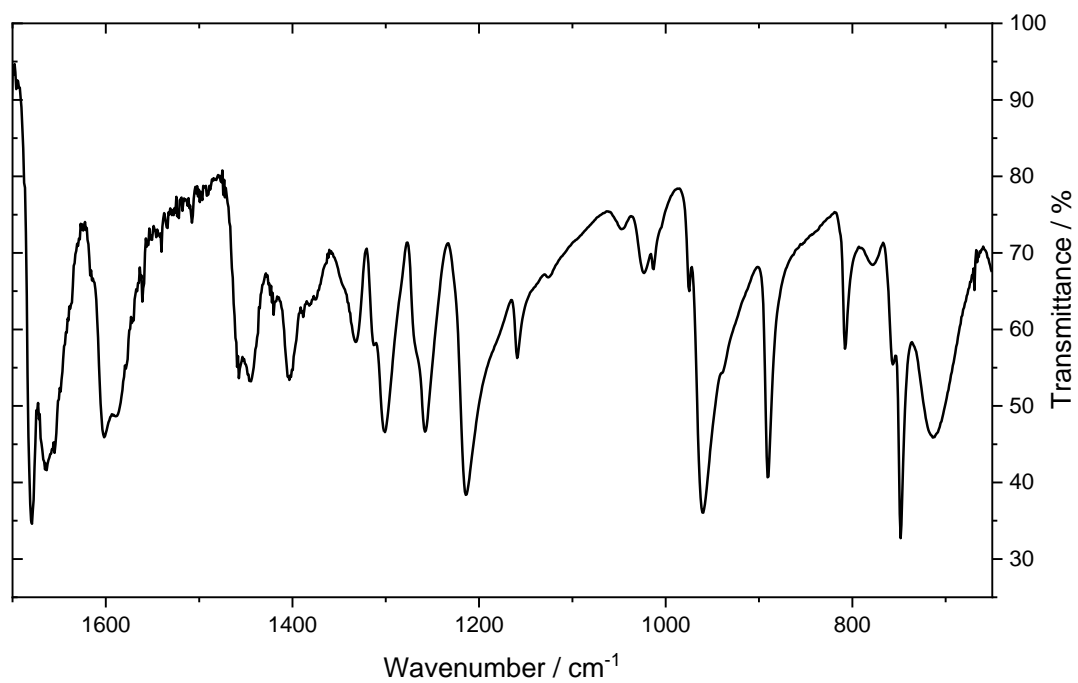

**Figure S1** IR spectrum of DFMP (top) with zoom of the 650-1700 cm<sup>-1</sup> region (bottom)

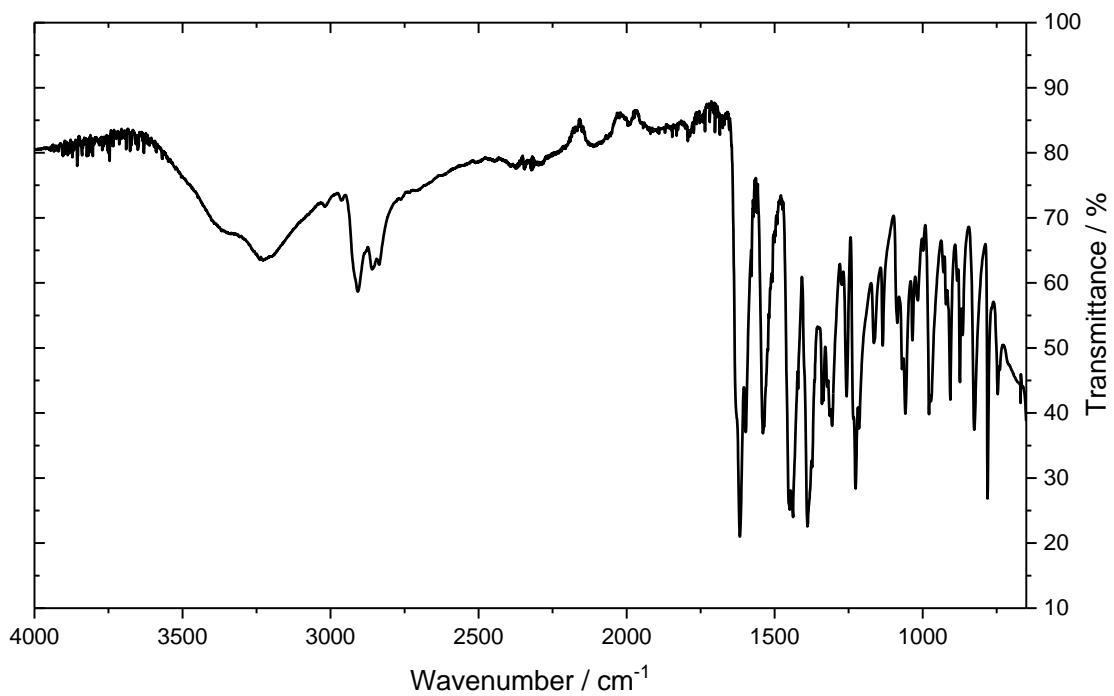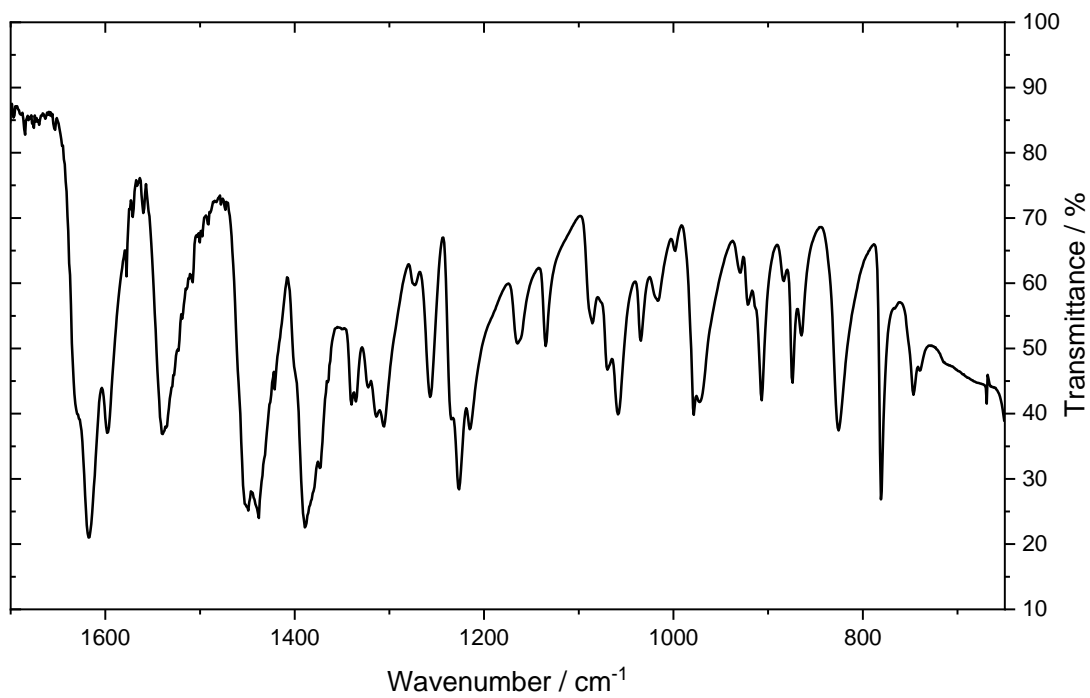

**Figure S2** IR spectrum of **1** (top) with zoom of the 650-1700 cm<sup>-1</sup> region (bottom)

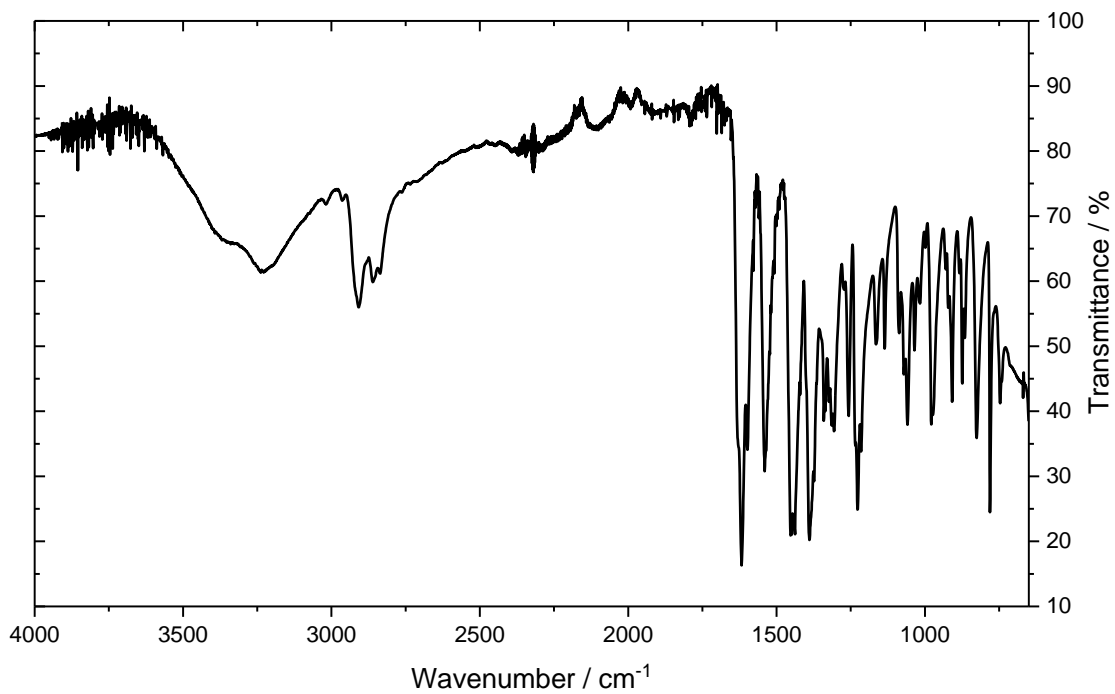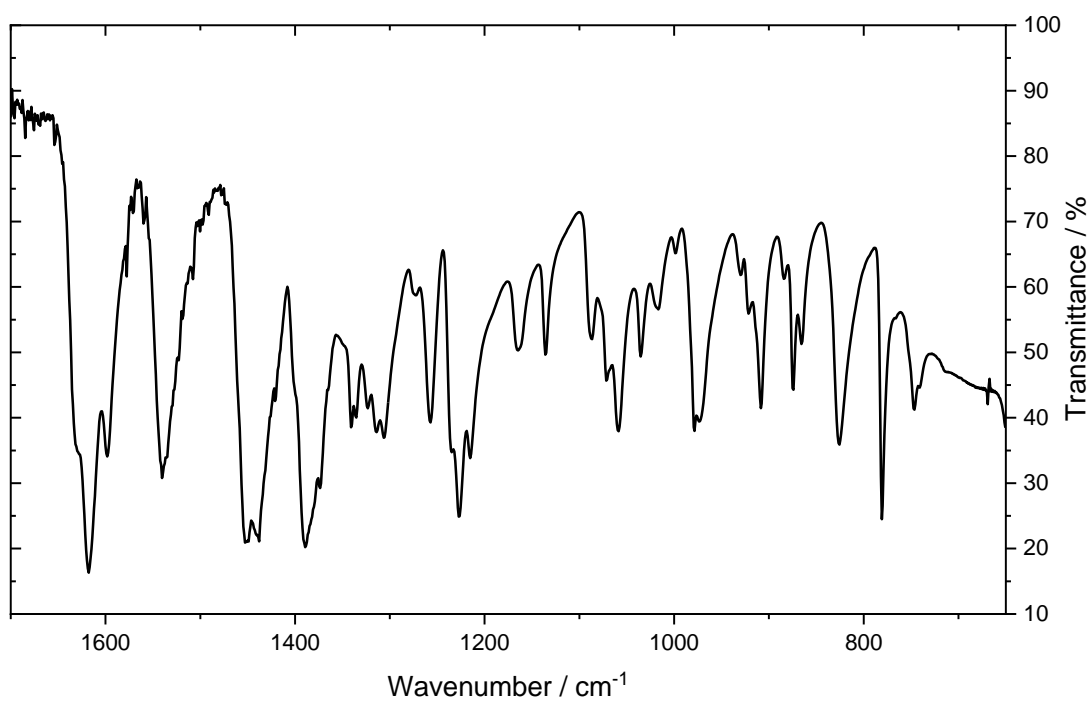

**Figure S3** IR spectrum of **2** (top) with zoom of the 650-1700 cm<sup>-1</sup> region (bottom)

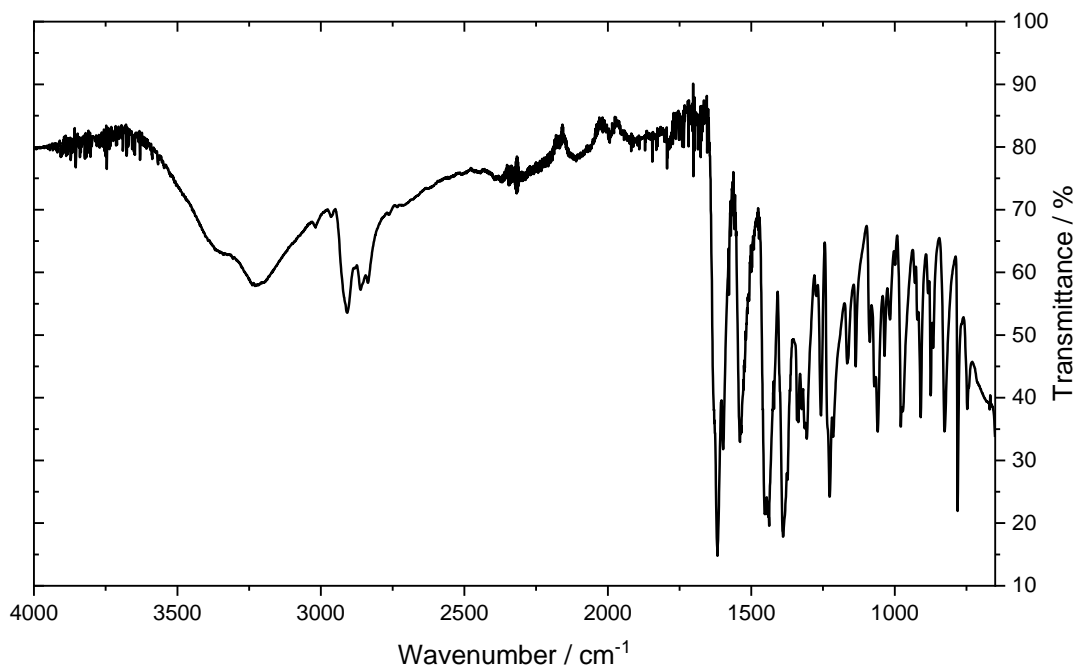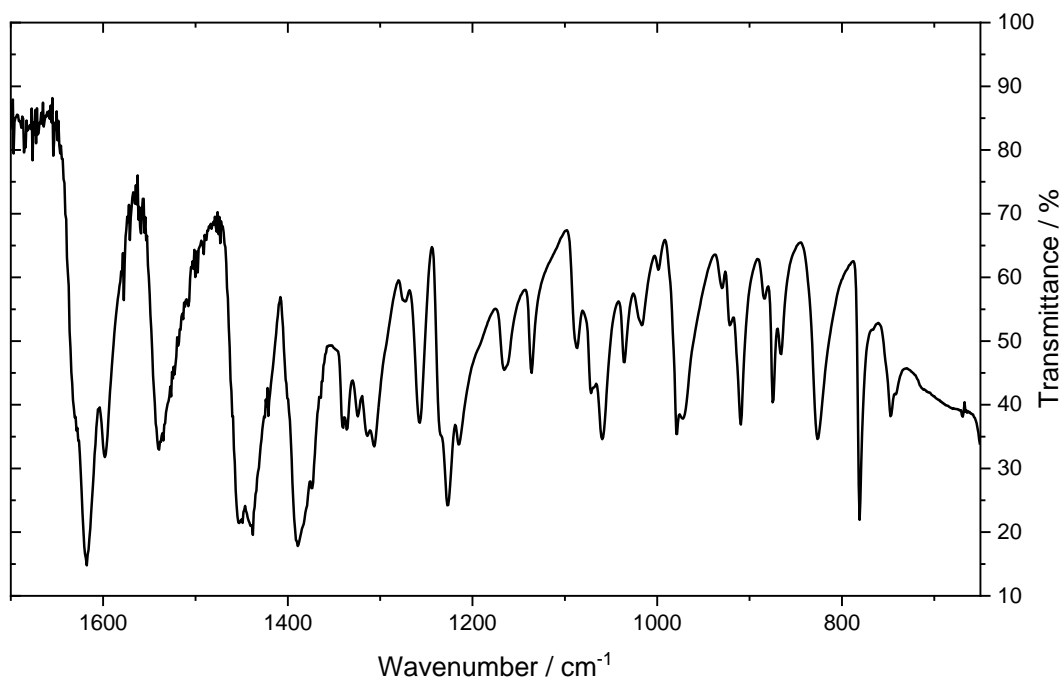

**Figure S4** IR spectrum of **3** (top) with zoom of the 650-1700 cm<sup>-1</sup> region (bottom)

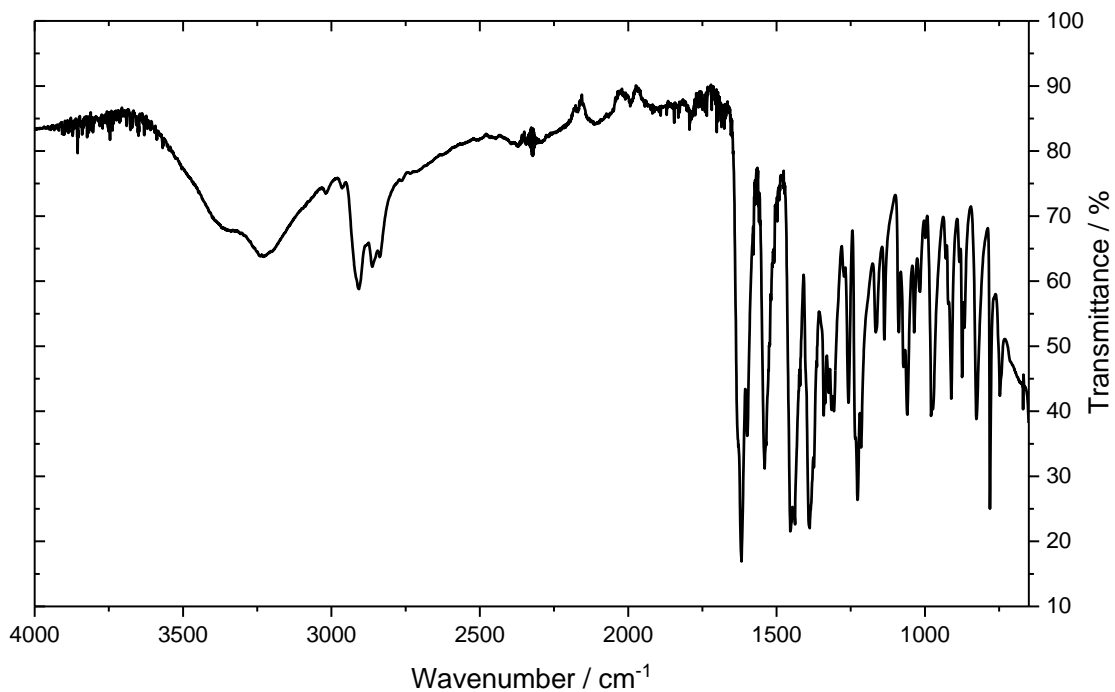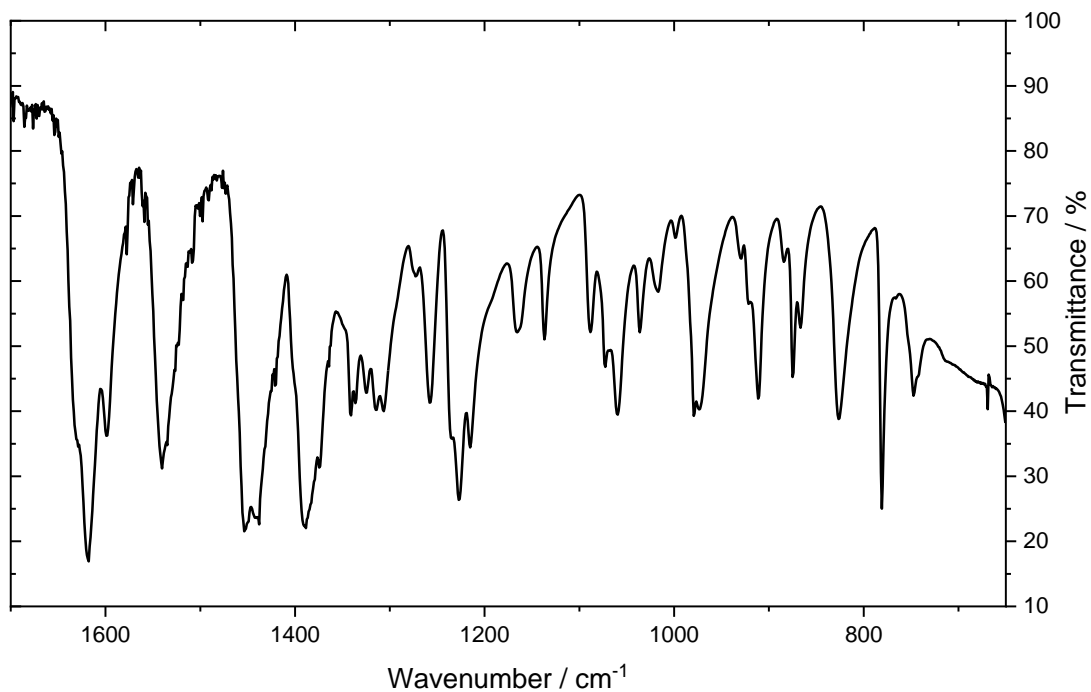

**Figure S5** IR spectrum of **4** (top) with zoom of the 650-1700 cm<sup>-1</sup> region (bottom)

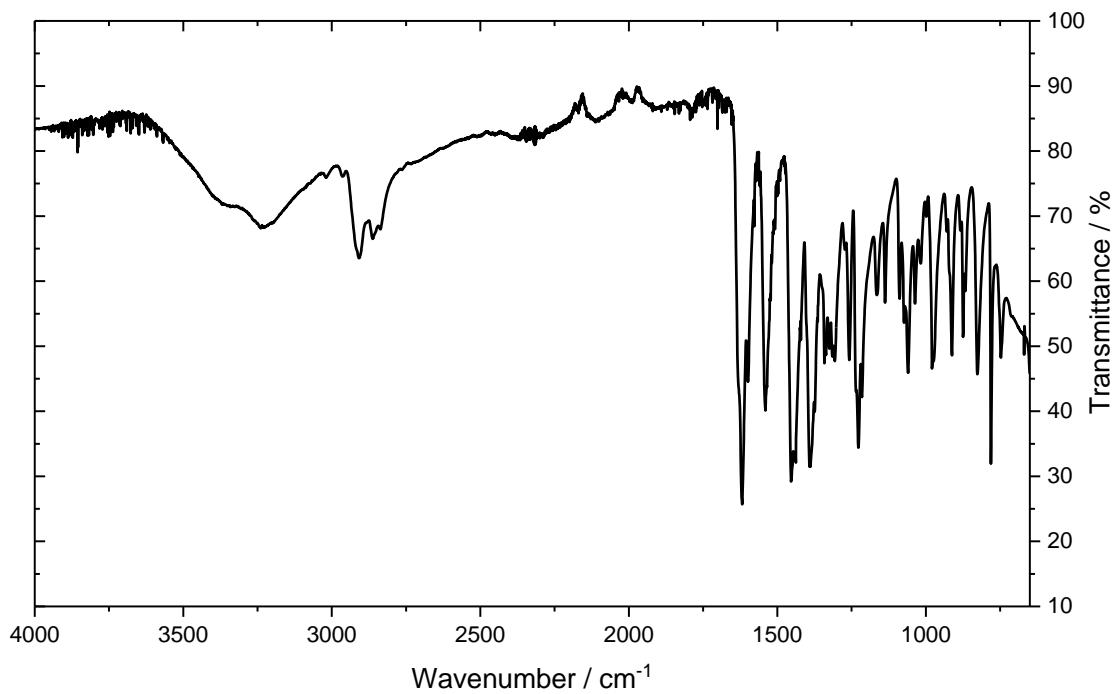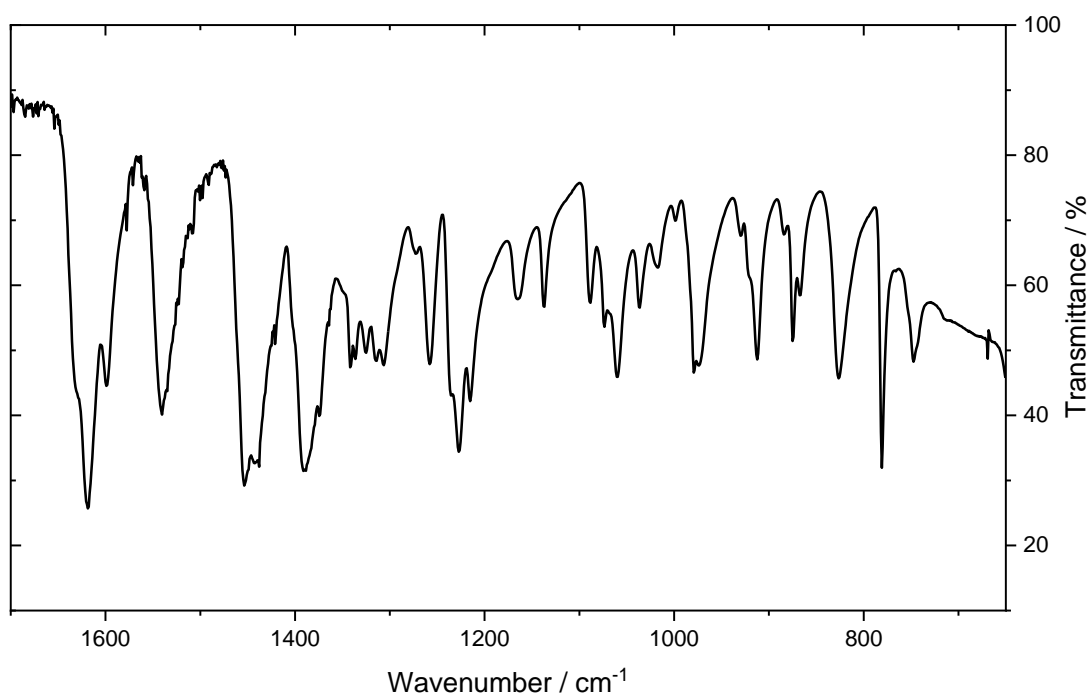

**Figure S6** IR spectrum of **5** (top) with zoom of the 650-1700 cm<sup>-1</sup> region (bottom)

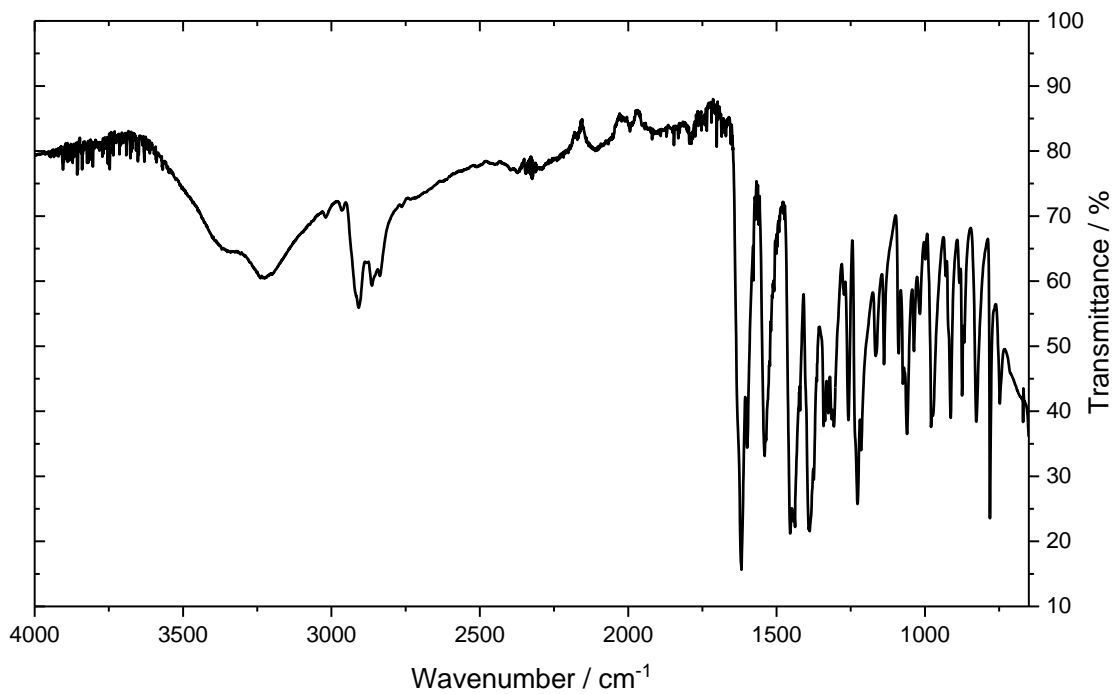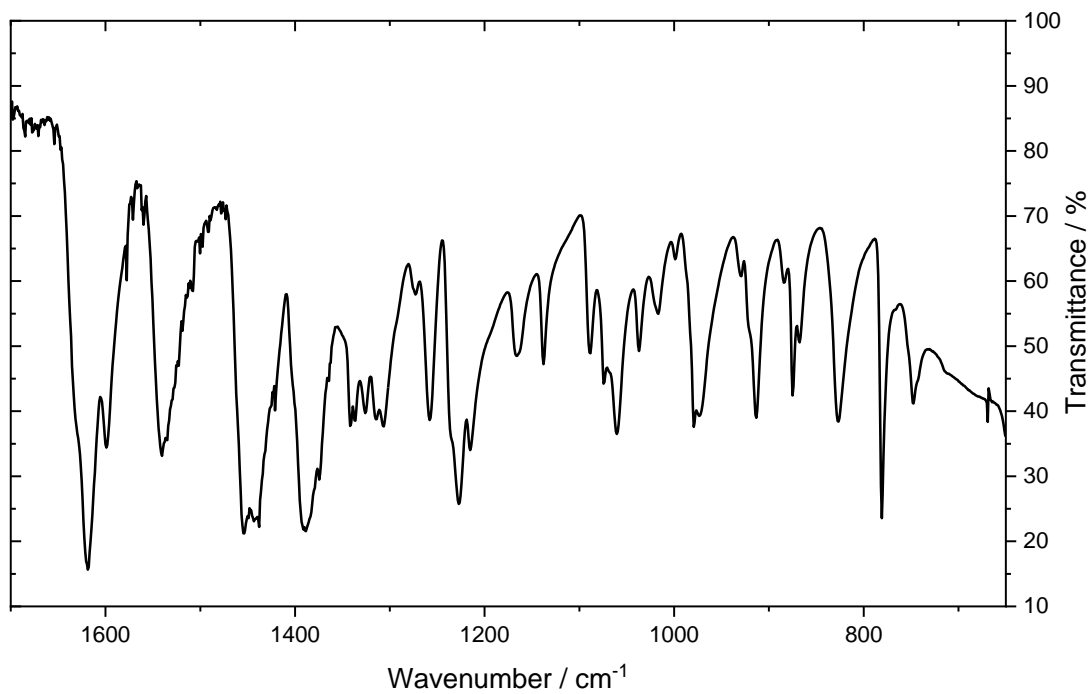

**Figure S7** IR spectrum of **6** (top) with zoom of the 650-1700 cm<sup>-1</sup> region (bottom)



## Powder X-ray diffraction

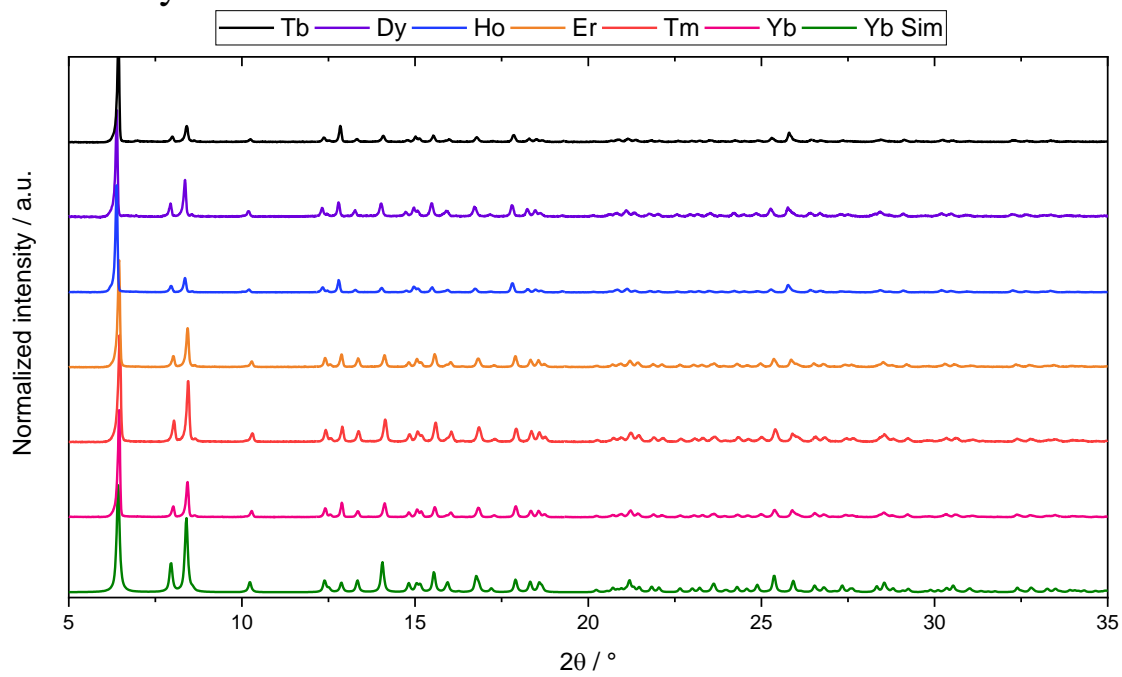

**Figure S8** PXRD of **1-6** at 300 K. The simulation is based on a crystal structure of **6** measured at room temperature.

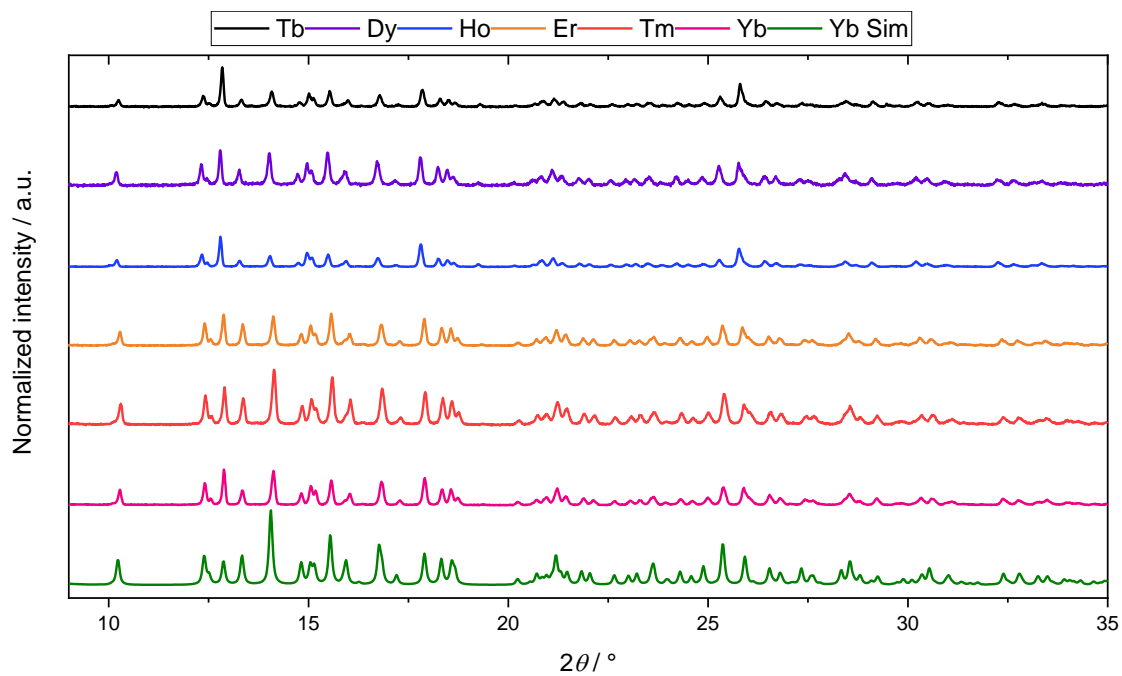

**Figure S9** Zoom in on the  $2\theta = 9 - 35^\circ$  region of the PXR D data. The simulation is based on a crystal structure of **6** measured at room temperature.

## NMR spectra

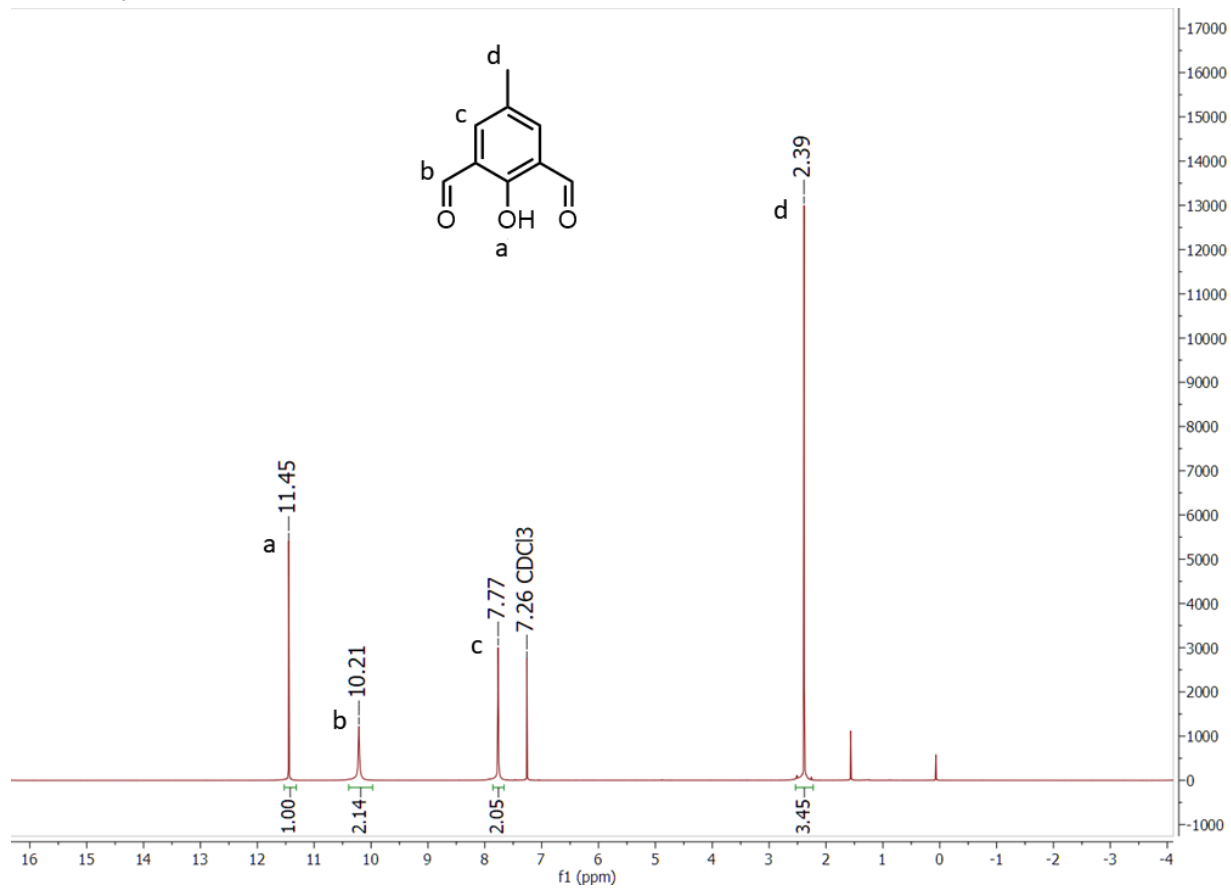

**Figure S10** <sup>1</sup>H NMR of DFMP in CDCl<sub>3</sub>. The unassigned peaks at 1.5 and 0 ppm are H<sub>2</sub>O and TMS in the chloroform, respectively.<sup>1</sup>

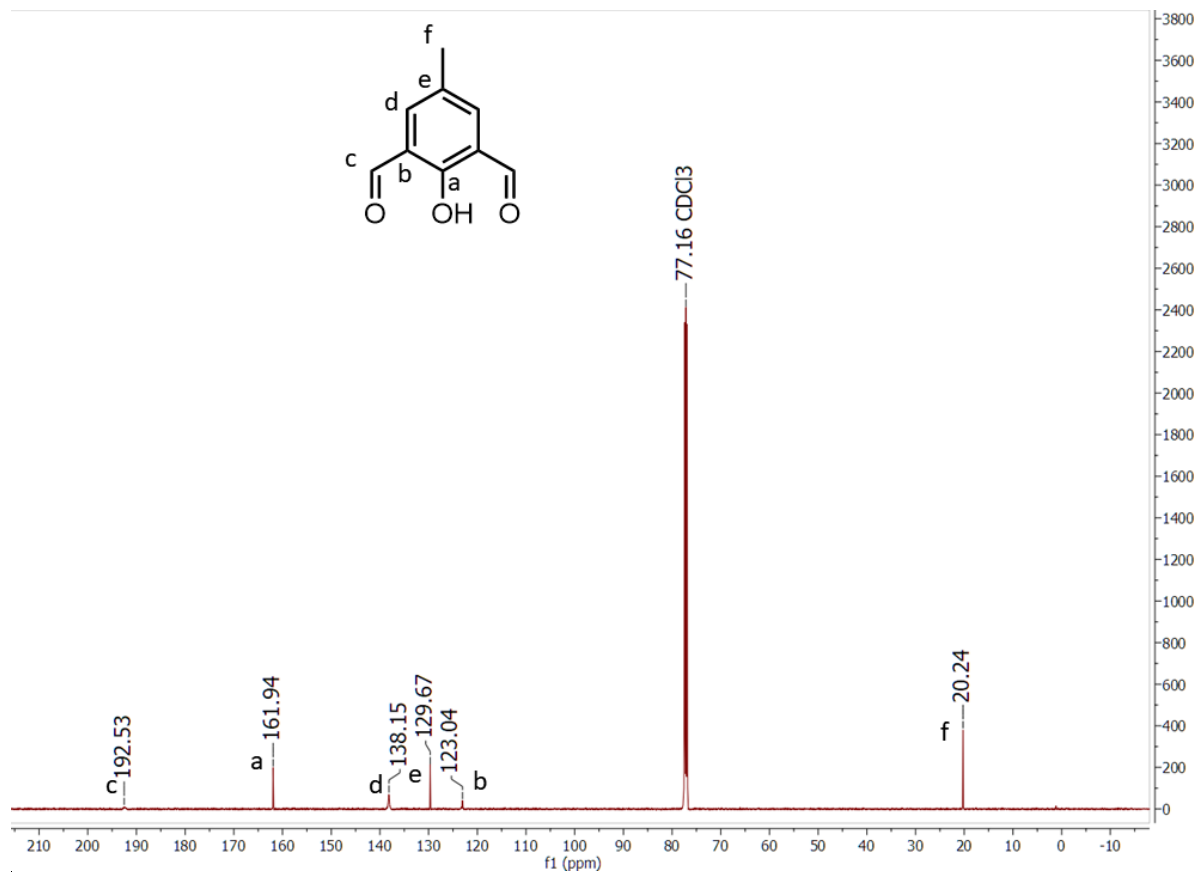

**Figure S11**  $^{13}\text{C}$  NMR of DFMP in  $\text{CDCl}_3$ .

# Mass spectra

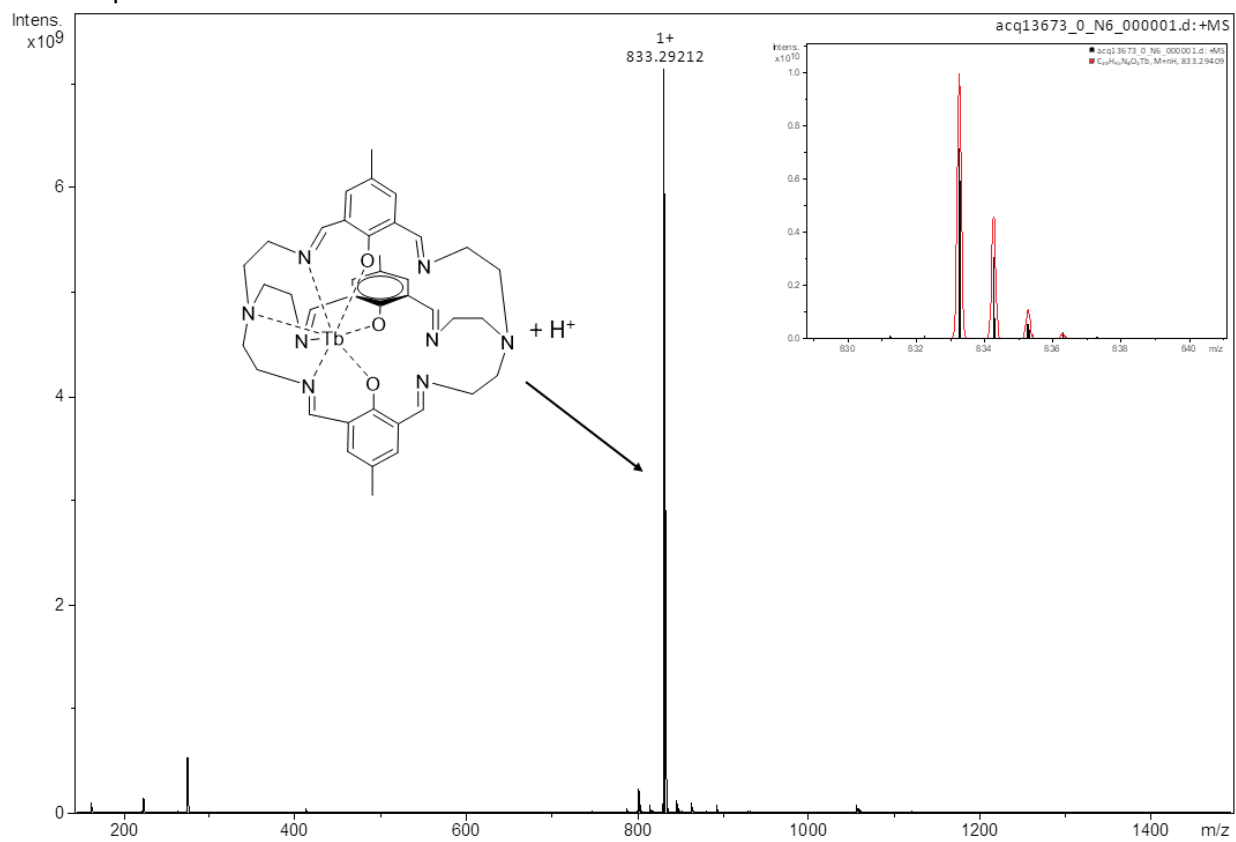

**Figure S12** MALDI positive mass spectrum of **1** with insert of signal from the molecular ion (black) with simulated isotope pattern (red)

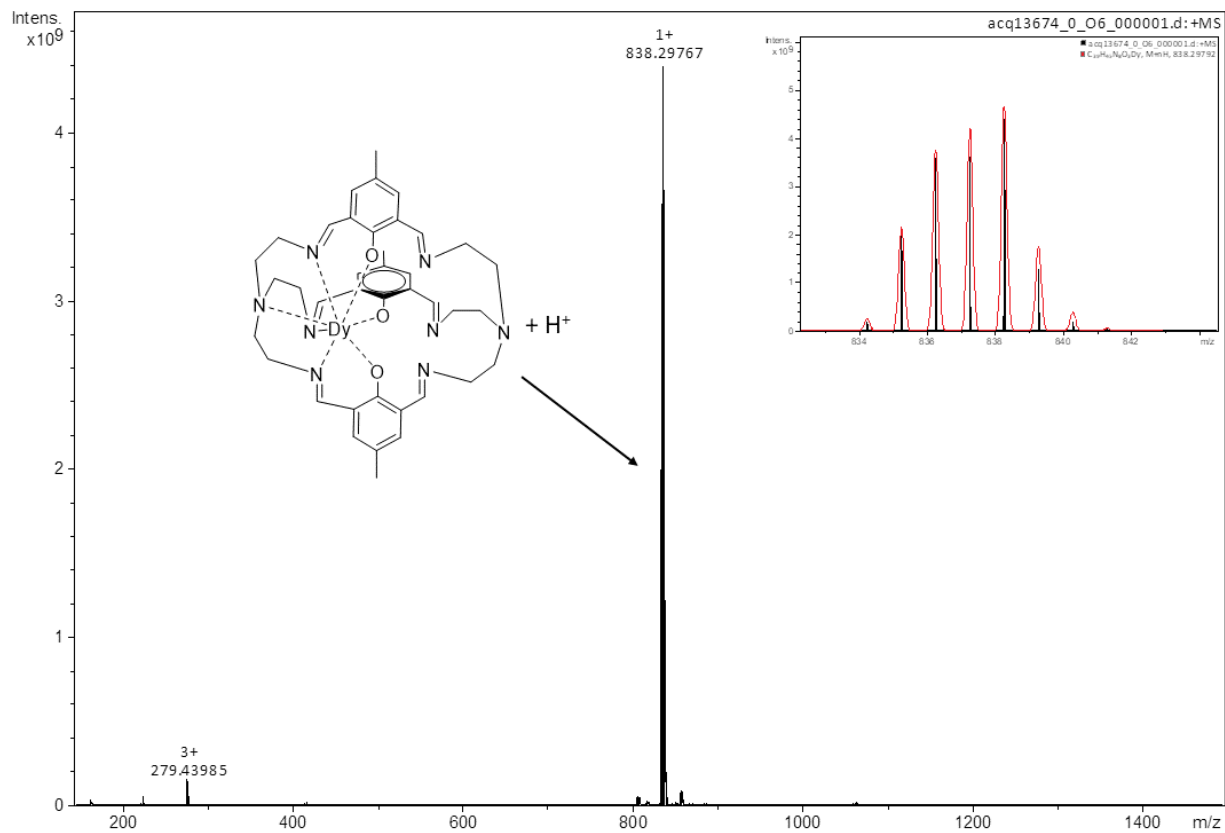

**Figure S13** MALDI positive mass spectrum of **2** with insert of signal from the molecular ion (black) with simulated isotope pattern (red)

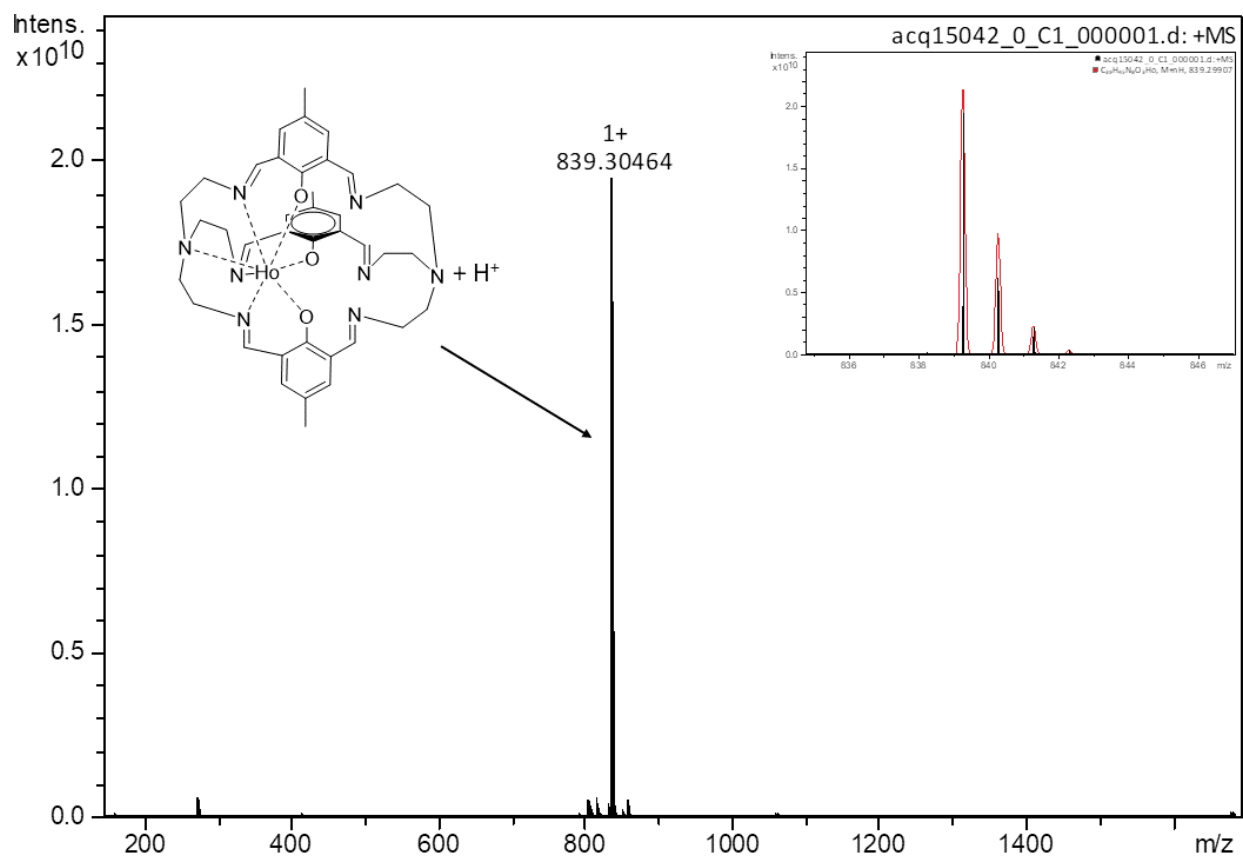

**Figure S14** MALDI positive mass spectrum of **3** with insert of signal from the molecular ion (black) with simulated isotope pattern (red)

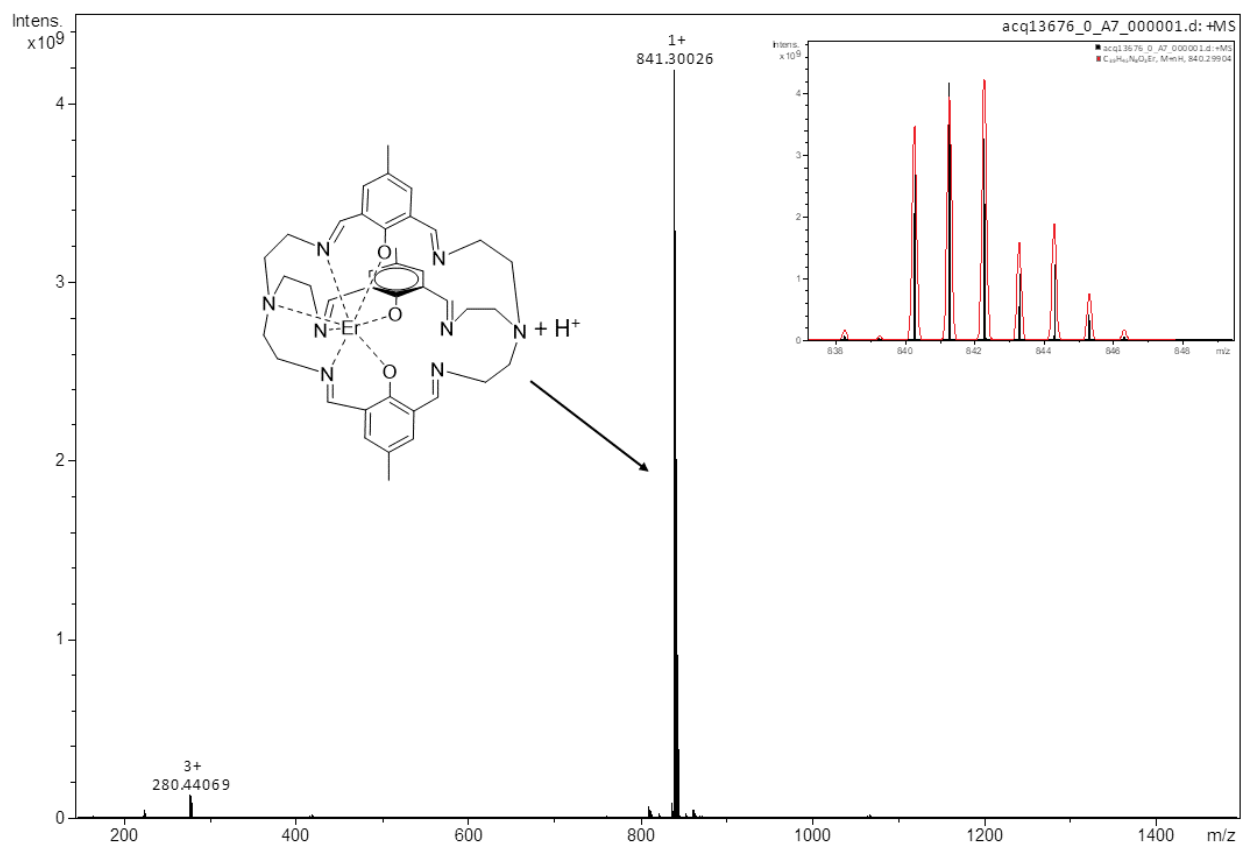

**Figure S15** MALDI positive mass spectrum of **4** with insert of signal from the molecular ion (black) with simulated isotope pattern (red)



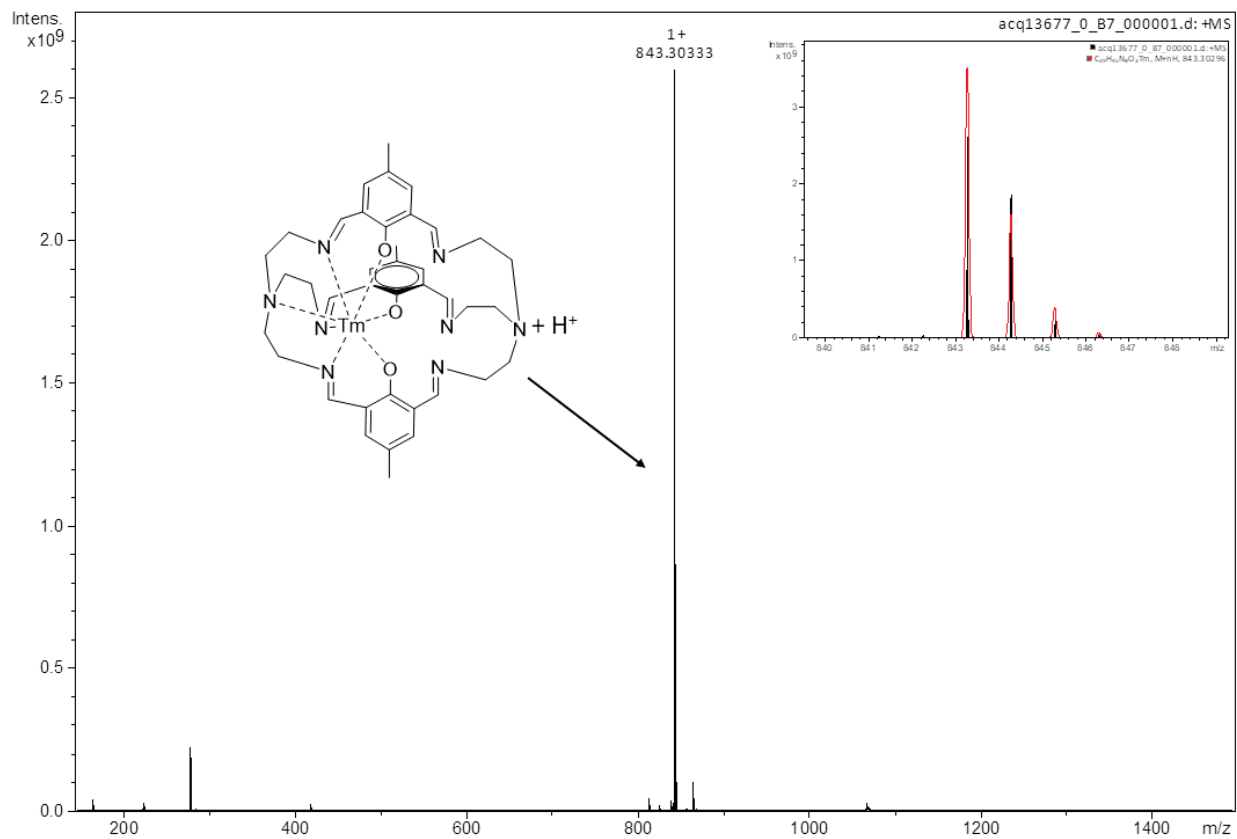

**Figure S16** MALDI positive mass spectrum of **5** with insert of signal from the molecular ion (black) with simulated isotope pattern (red)

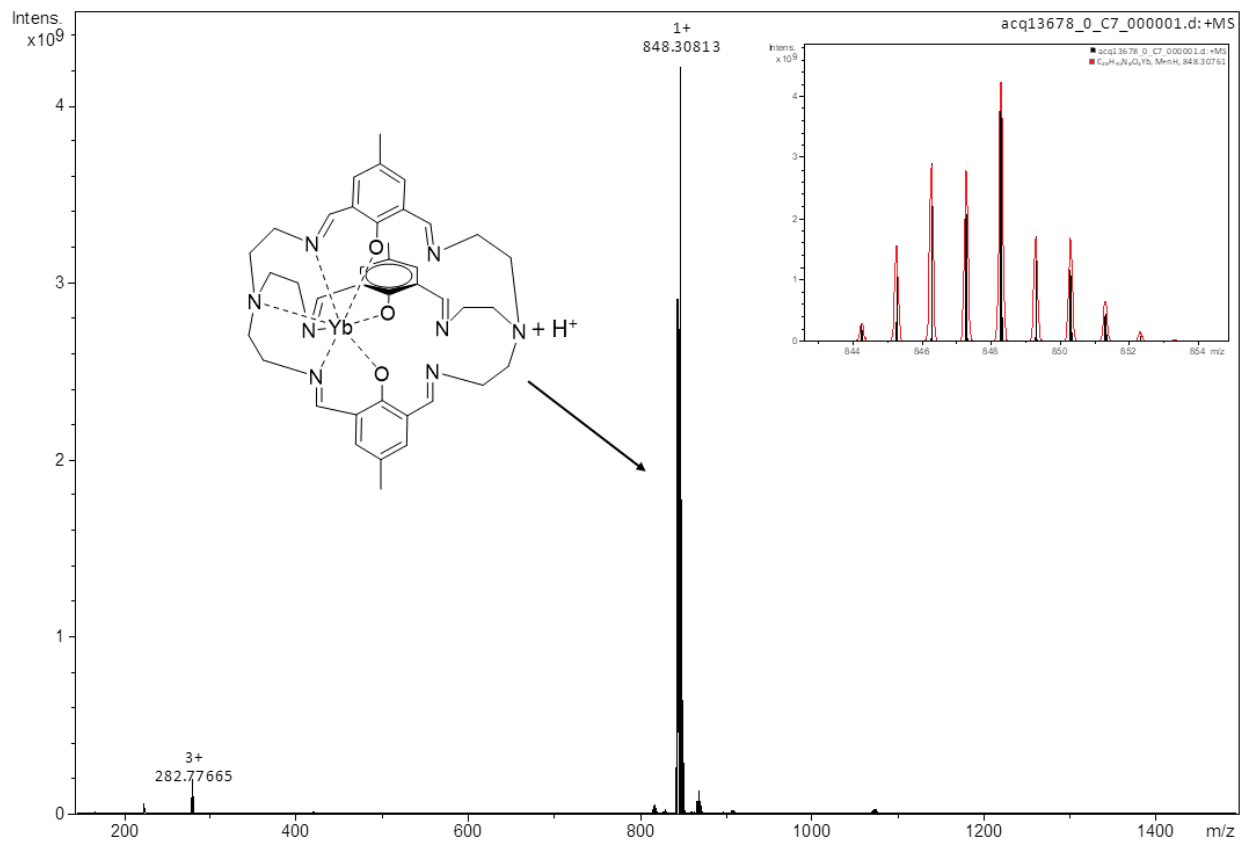

## Variable-temperature-variable-field measurements

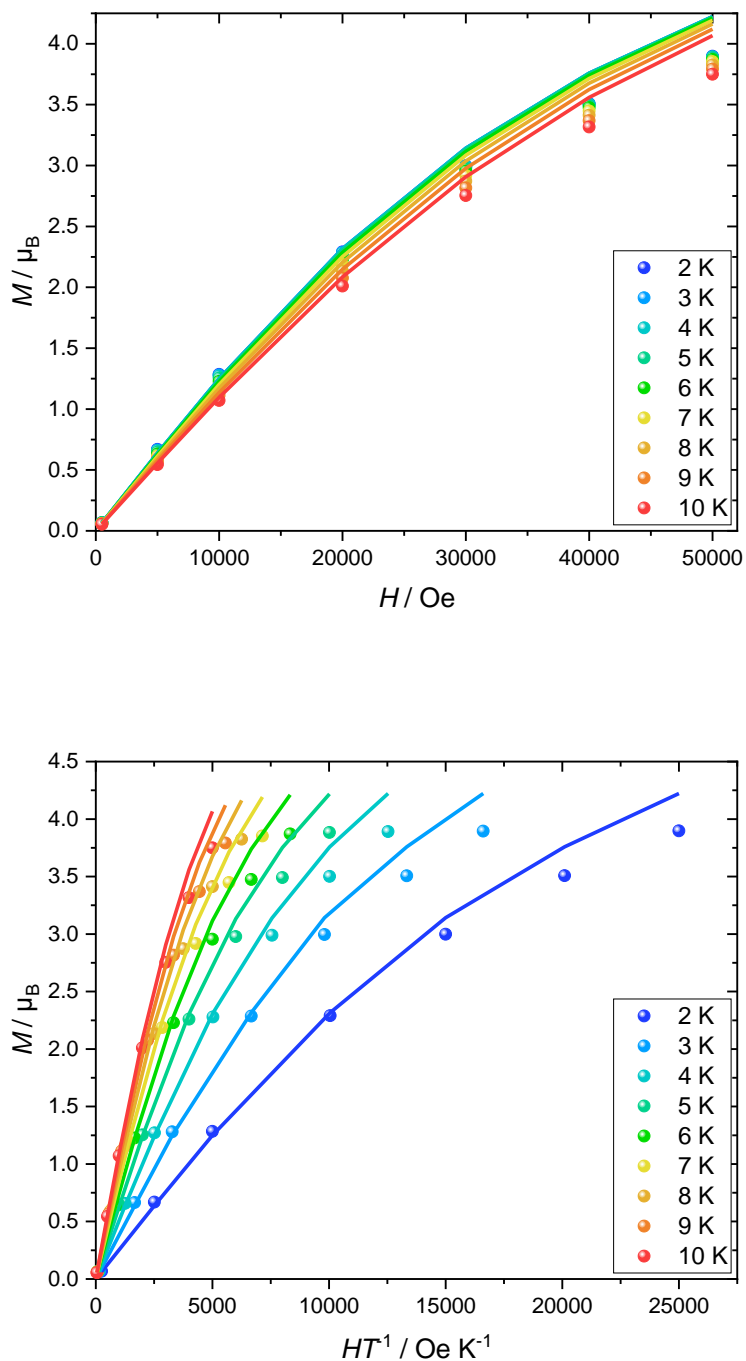

**Figure S18** Variable-temperature-variable-field measurements of **1** (top) and reduced magnetisation of **1** (bottom) including the best fit (lines) as described in the main text with the CF parameters found in Table S5.

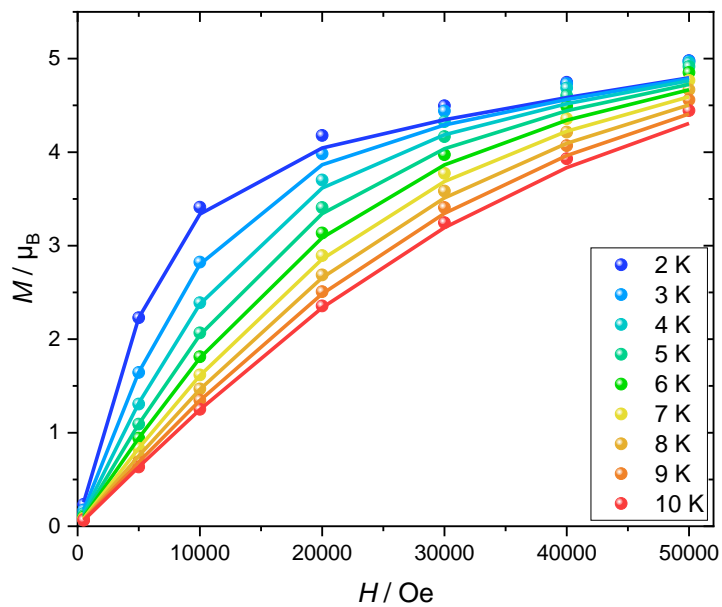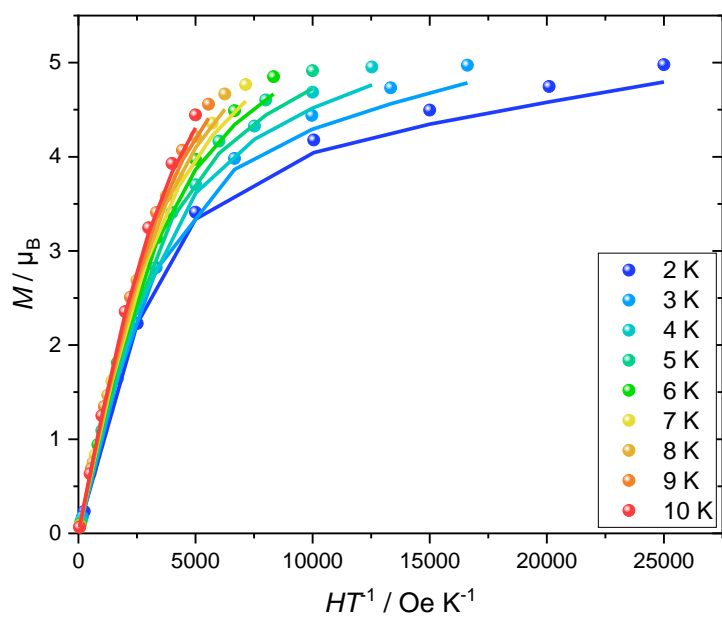

**Figure S19** Variable-temperature-variable-field measurements of **2** (top) and reduced magnetisation of **2** (bottom) including the best fit (lines) as described in the main text with the CF parameters found in Table S5.

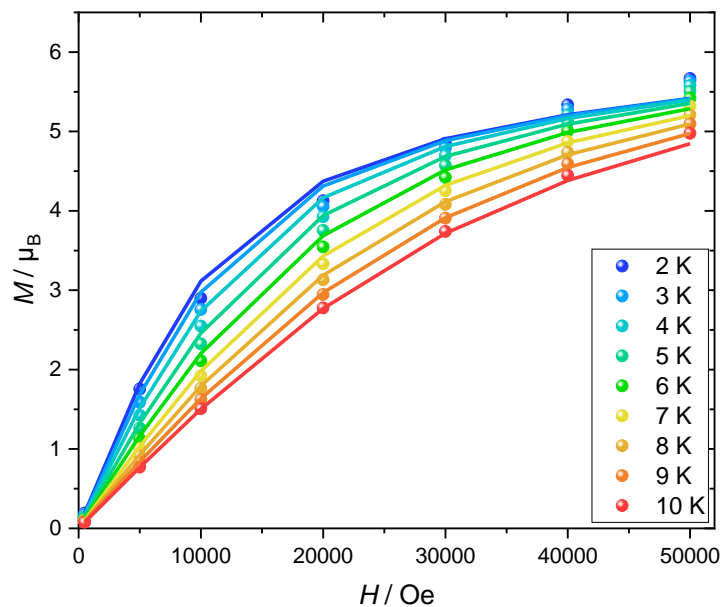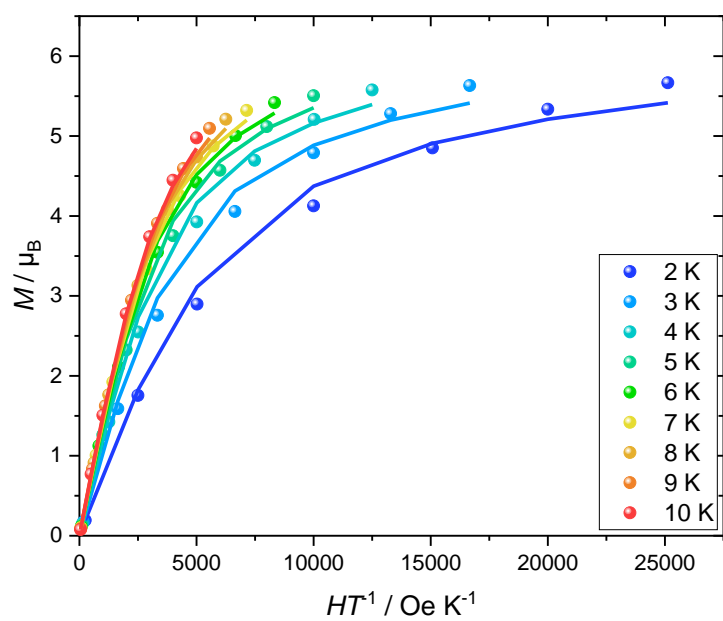

**Figure S20** Variable-temperature-variable-field measurements of **3** (top) and reduced magnetisation of **3** (bottom) including the best fit (lines) as described in the main text with the CF parameters found in Table S5.

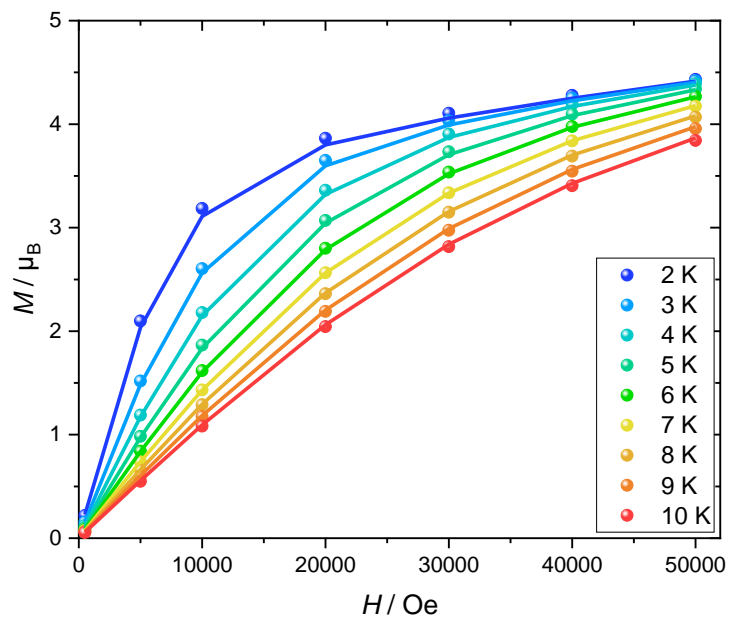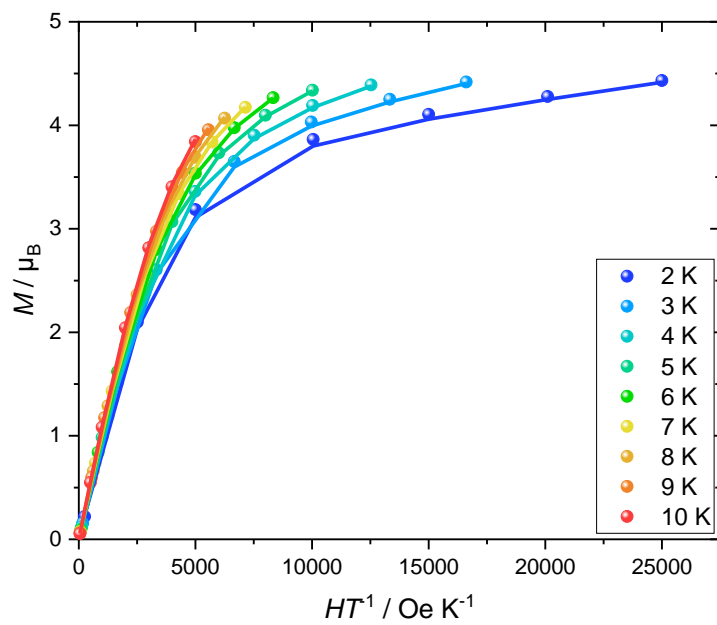

**Figure S21** Variable-temperature-variable-field measurements of **4** (top) and reduced magnetisation of **4** (bottom) including the best fit (lines) as described in the main text with the CF parameters found in Table S5.

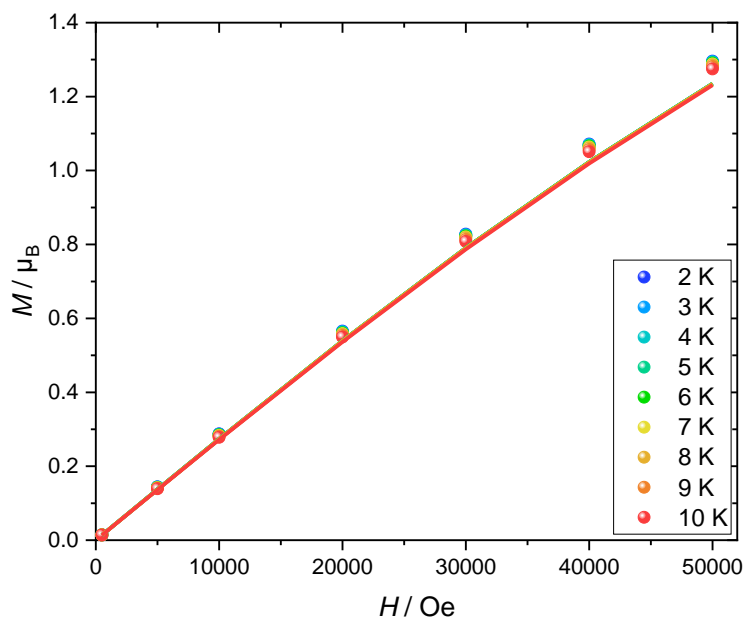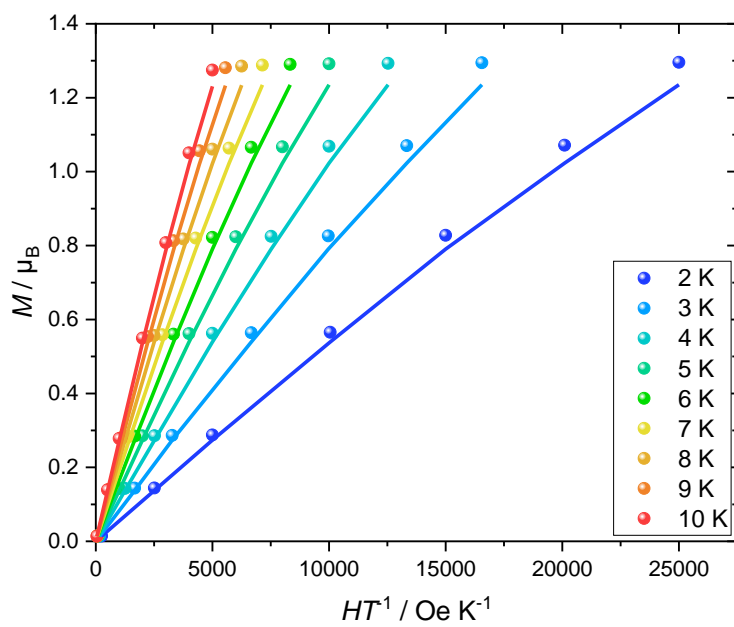

**Figure S22** Variable-temperature-variable-field measurements of **5** (top) and reduced magnetisation of **5** (bottom) including the best fit (lines) as described in the main text with the CF parameters found in Table S5.

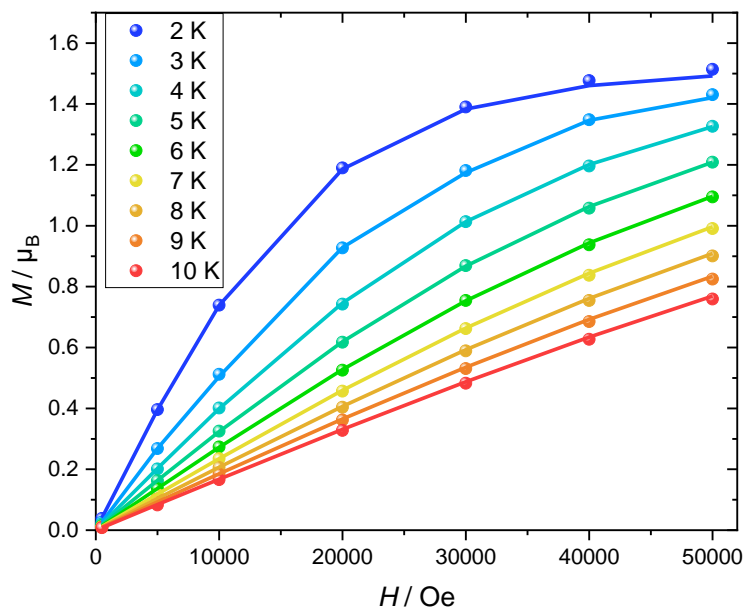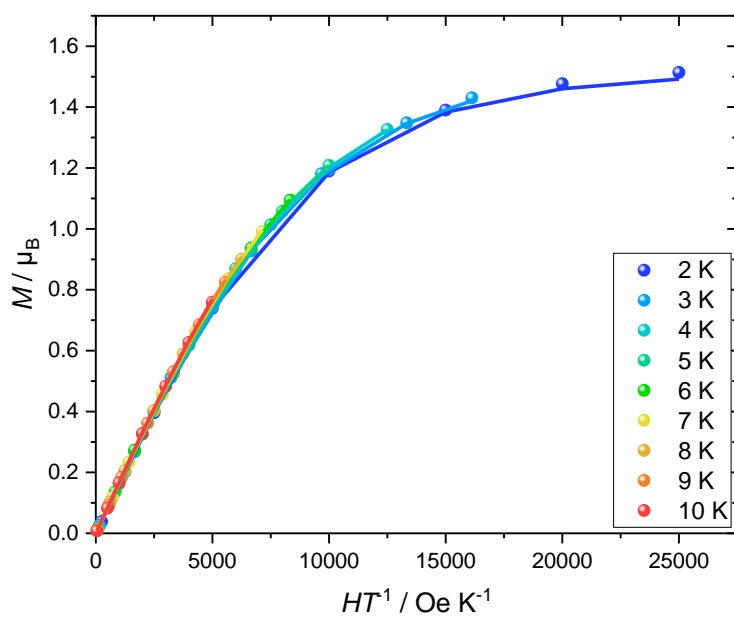

**Figure S23** Variable-temperature-variable-field measurements of **6** (top) and reduced magnetisation of **6** (bottom) including the best fit (lines) as described in the main text with the CF parameters found in Table S5.



## Modelling using only diagonal terms

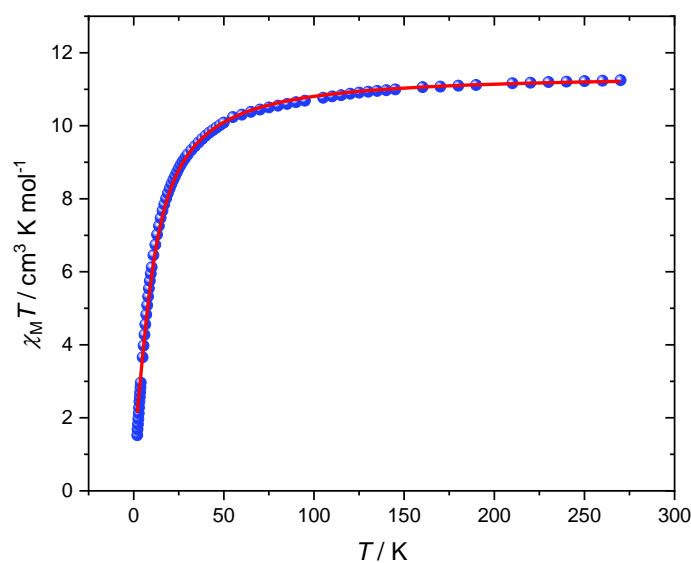

**Figure S24** Temperature dependence of the molar  $\chi T$  product of **1** (point) and fit (lines) including only diagonal CF terms as described in the main text. The CF parameters can be found in Table S4.

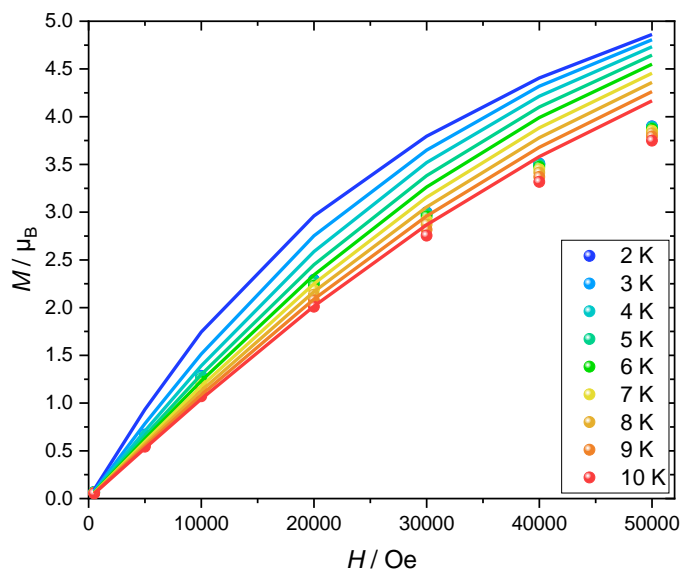

**Figure S25** Variable-temperature-variable-field measurements of **1** (points) and best fit (lines) including only diagonal CF terms as described in the main text. The CF parameters can be found in Table S4.

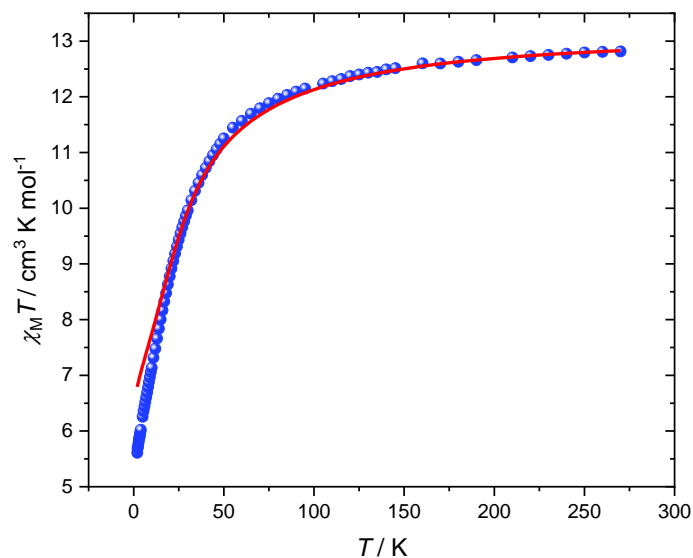

**Figure S26** Temperature dependence of the molar  $\chi T$  product of **2** (point) and fit (lines) including only diagonal CF terms as described in the main text. The CF parameters can be found in Table S4.

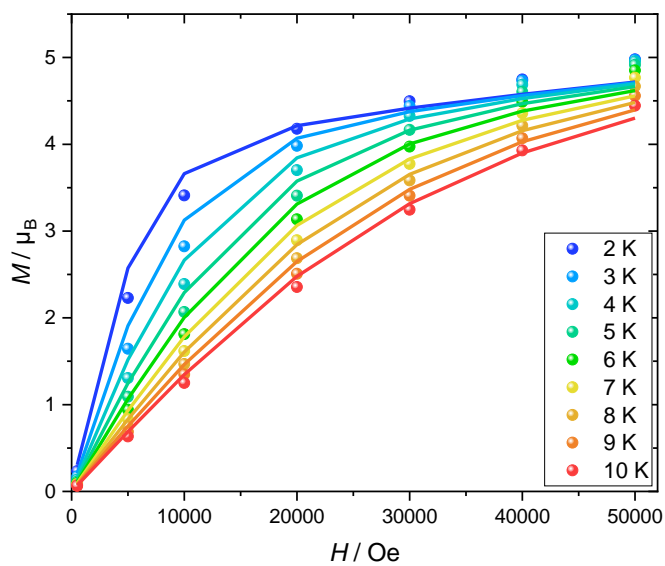

**Figure S27** Variable-temperature-variable-field measurements of **2** (points) and best fit (lines) including only diagonal CF terms as described in the main text. The CF parameters can be found in Table S4.

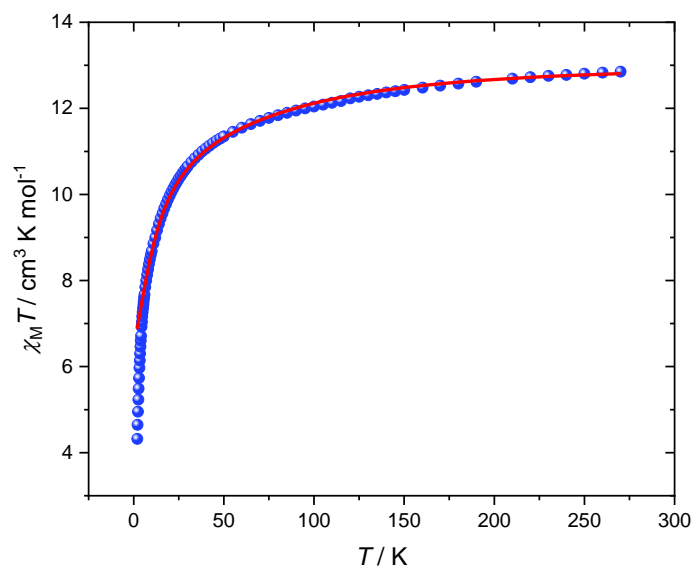

**Figure S28** Temperature dependence of the molar  $\chi T$  product of **3** (point) and fit (lines) including only diagonal CF terms as described in the main text. The CF parameters can be found in Table S4.

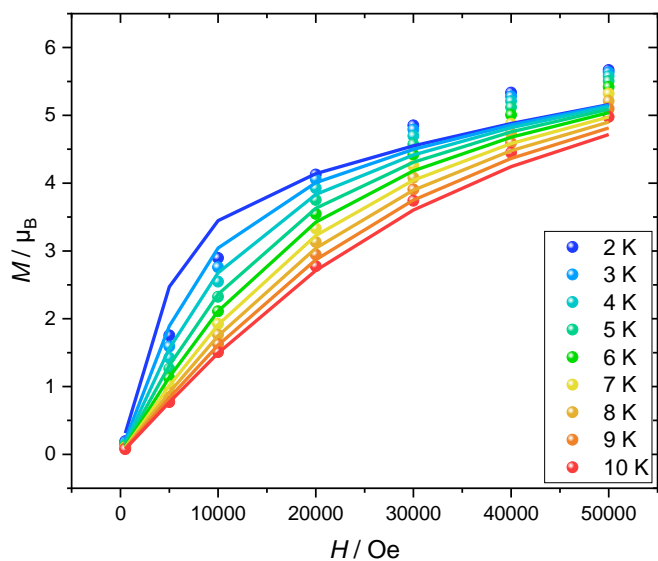

**Figure S29** Variable-temperature-variable-field measurements of **3** (points) and best fit (lines) including only diagonal CF terms as described in the main text. The CF parameters can be found in Table S4.

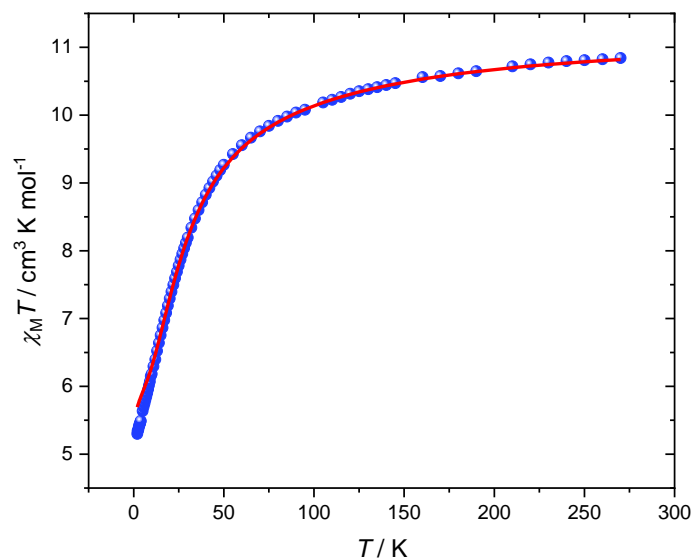

**Figure S30** Temperature dependence of the molar  $\chi T$  product of **4** (point) and fit (lines) including only diagonal CF terms as described in the main text. The CF parameters can be found in Table S4.

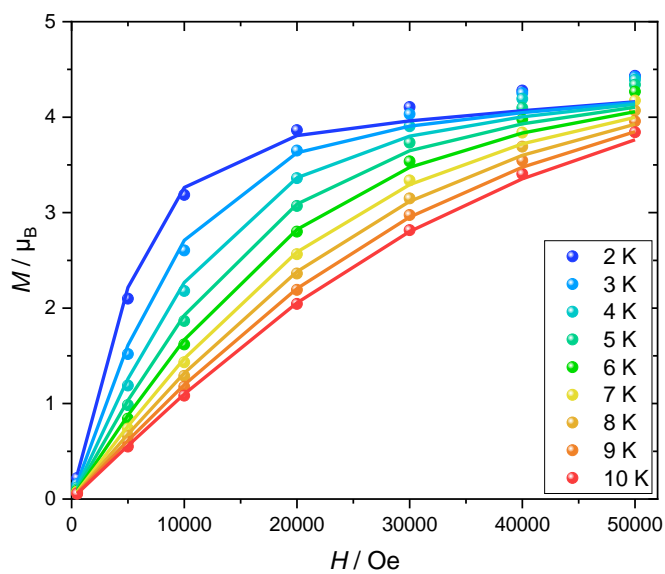

**Figure S31** Variable-temperature-variable-field measurements of **4** (points) and best fit (lines) including only diagonal CF terms as described in the main text. The CF parameters can be found in Table S4.

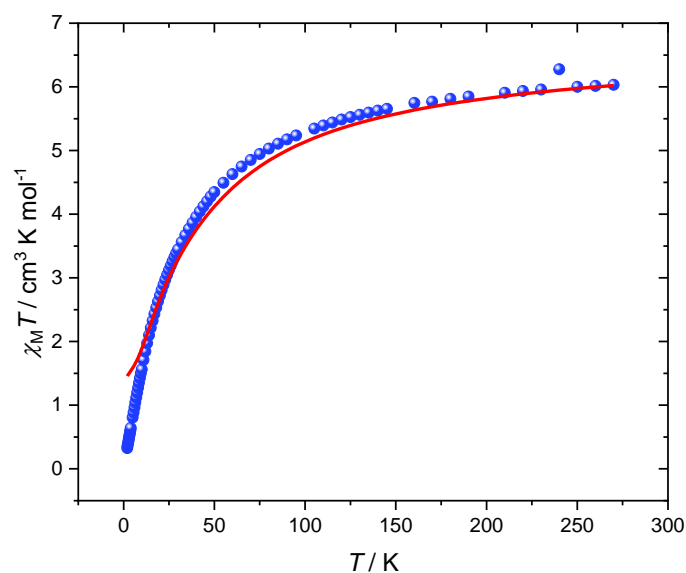

**Figure S32** Temperature dependence of the molar  $\chi T$  product of **5** (point) and fit (lines) including only diagonal CF terms as described in the main text. The CF parameters can be found in Table S4.

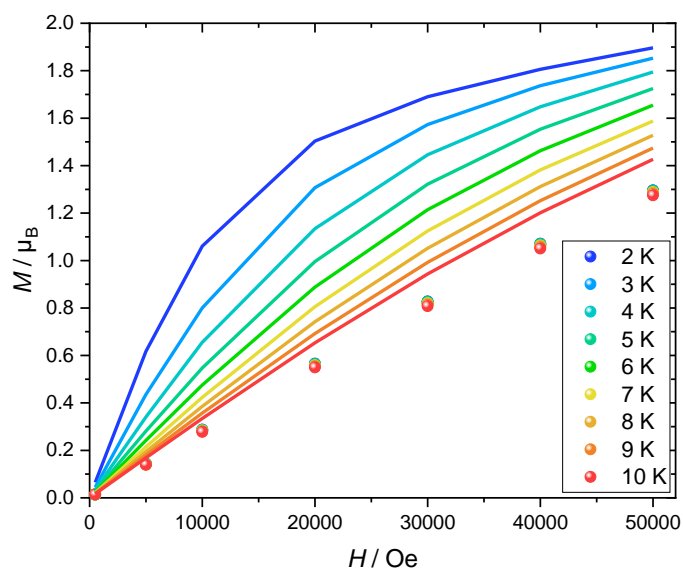

**Figure S33** Variable-temperature-variable-field measurements of **5** (points) and best fit (lines) including only diagonal CF terms as described in the main text. The CF parameters can be found in Table S4.

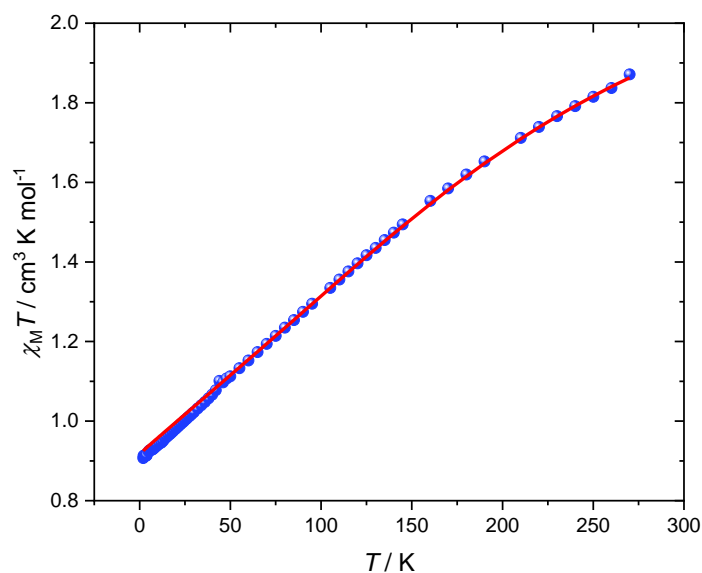

**Figure S34** Temperature dependence of the molar  $\chi T$  product of **6** (point) and fit (lines) including only diagonal CF terms as described in the main text. The CF parameters can be found in Table S4.

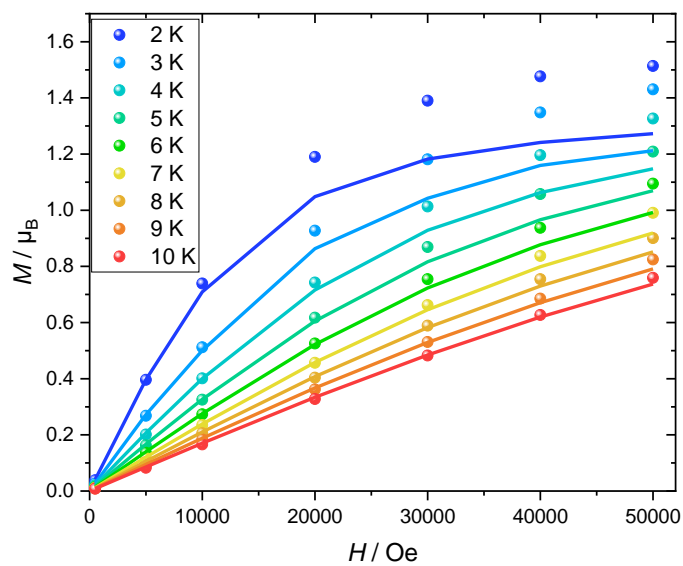

**Figure S35** Variable-temperature-variable-field measurements of **5** (points) and best fit (lines) including only diagonal CF terms as described in the main text. The CF parameters can be found in Table S4.

## Crystal field parameters

**Table S1** Stevens parameters in  $\text{cm}^{-1}$  for selected Ln(trensals)

| Parameters | Tb(trensals) <sup>2</sup> | Dy(trensals) <sup>2</sup> | Ho(trensals) <sup>2</sup> | Er(trensals) <sup>2,3</sup> | Tm(trensals) <sup>2</sup> | Yb(trensals) <sup>4</sup> |
|------------|---------------------------|---------------------------|---------------------------|-----------------------------|---------------------------|---------------------------|
| $B_2^0$    | 3.12                      | 2.13                      | 0.351                     | -0.914                      | -4.81                     | -11.13                    |
| $B_4^0$    | $1.36 \cdot 10^{-3}$      | $1.38 \cdot 10^{-3}$      | $7.74 \cdot 10^{-4}$      | $-2.44 \cdot 10^{-4}$       | $1.75 \cdot 10^{-3}$      | -0.153                    |
| $B_4^{+3}$ | 0.698                     | -0.377                    | -0.188                    | 0.279                       | 0.860                     | 8.92                      |
| $B_6^{-6}$ | $-2.83 \cdot 10^{-4}$     | $1.43 \cdot 10^{-4}$      | $-7.00 \cdot 10^{-4}$     | $6.12 \cdot 10^{-4}$        | $6.34 \cdot 10^{-4}$      | 0.101                     |
| $B_6^{-3}$ | $1.85 \cdot 10^{-4}$      | $3.76 \cdot 10^{-4}$      | $-4.66 \cdot 10^{-4}$     | $-2.44 \cdot 10^{-4}$       | $-1.94 \cdot 10^{-3}$     | 0.07                      |
| $B_6^0$    | $-1.11 \cdot 10^{-4}$     | $8.03 \cdot 10^{-5}$      | $-9.27 \cdot 10^{-5}$     | $1.28 \cdot 10^{-4}$        | $-4.09 \cdot 10^{-4}$     | $0.71 \cdot 10^{-2}$      |
| $B_6^{+3}$ | $1.03 \cdot 10^{-3}$      | $-5.82 \cdot 10^{-4}$     | $1.21 \cdot 10^{-3}$      | $-9.36 \cdot 10^{-4}$       | $1.03 \cdot 10^{-3}$      | -0.060                    |
| $B_6^{+6}$ | $-1.17 \cdot 10^{-3}$     | $6.49 \cdot 10^{-4}$      | $-5.65 \cdot 10^{-4}$     | $1.07 \cdot 10^{-3}$        | $-4.27 \cdot 10^{-3}$     | 0.034                     |

**Table S2** Stevens parameters in  $\text{cm}^{-1}$  for **1-6** obtained as the best fit to the  $\chi T$  product and variable-temperature-variable-field measurements setting the off-diagonal CF parameters to 0 and only modelling using the diagonal parameters as described in the main text

| Parameters | <b>1</b>              | <b>2</b>             | <b>3</b>             | <b>4</b>              | <b>5</b>              | <b>6</b>             |
|------------|-----------------------|----------------------|----------------------|-----------------------|-----------------------|----------------------|
| $B_2^0$    | 3.10                  | 2.13                 | 0.345                | -0.769                | -2.00                 | -11.28               |
| $B_4^0$    | $-3.73 \cdot 10^{-3}$ | $8.21 \cdot 10^{-3}$ | $8.58 \cdot 10^{-3}$ | $-1.24 \cdot 10^{-2}$ | $6.25 \cdot 10^{-3}$  | 0.313                |
| $B_6^0$    | $-2.66 \cdot 10^{-4}$ | $1.39 \cdot 10^{-4}$ | $6.84 \cdot 10^{-5}$ | $1.15 \cdot 10^{-4}$  | $-8.19 \cdot 10^{-4}$ | $2.10 \cdot 10^{-2}$ |

**Table S3** Stevens parameters in  $\text{cm}^{-1}$  for **1-6** obtained as the best fit to the  $\chi T$  product and field-dependent magnetisation measurements fixing the off-diagonal CF parameters to those of the corresponding Ln(trensals) complex as described in the main text. Fit parameters are in bold.

| Parameters | <b>1</b>                                | <b>2</b>                               | <b>3</b>                                | <b>4</b>                                | <b>5</b>                               | <b>6</b>                                |
|------------|-----------------------------------------|----------------------------------------|-----------------------------------------|-----------------------------------------|----------------------------------------|-----------------------------------------|
| $B_2^0$    | <b>4.22</b>                             | <b>3.38</b>                            | <b>2.16</b>                             | <b>-0.913</b>                           | <b>-3.50</b>                           | <b>-7.86</b>                            |
| $B_4^0$    | <b><math>6.53 \cdot 10^{-5}</math></b>  | <b><math>9.64 \cdot 10^{-3}</math></b> | <b><math>8.59 \cdot 10^{-3}</math></b>  | <b><math>-3.22 \cdot 10^{-3}</math></b> | <b><math>2.10 \cdot 10^{-8}</math></b> | <b><math>-2.52 \cdot 10^{-2}</math></b> |
| $B_4^{+3}$ | 0.698                                   | -0.377                                 | -0.188                                  | 0.279                                   | 0.860                                  | 8.92                                    |
| $B_6^{-6}$ | $-2.83 \cdot 10^{-4}$                   | $1.43 \cdot 10^{-4}$                   | $-7.00 \cdot 10^{-4}$                   | $6.12 \cdot 10^{-4}$                    | $6.34 \cdot 10^{-4}$                   | 0.101                                   |
| $B_6^{-3}$ | $1.85 \cdot 10^{-4}$                    | $3.76 \cdot 10^{-4}$                   | $-4.66 \cdot 10^{-4}$                   | $-2.44 \cdot 10^{-4}$                   | $-1.94 \cdot 10^{-3}$                  | 0.07                                    |
| $B_6^0$    | <b><math>-4.55 \cdot 10^{-5}</math></b> | <b><math>1.29 \cdot 10^{-4}</math></b> | <b><math>-9.89 \cdot 10^{-6}</math></b> | <b><math>6.25 \cdot 10^{-8}</math></b>  | <b><math>2.47 \cdot 10^{-4}</math></b> | <b><math>6.28 \cdot 10^{-5}</math></b>  |
| $B_6^{+3}$ | $1.03 \cdot 10^{-3}$                    | $-5.82 \cdot 10^{-4}$                  | $1.21 \cdot 10^{-3}$                    | $-0.936 \cdot 10^{-3}$                  | $1.03 \cdot 10^{-3}$                   | -0.060                                  |
| $B_6^{+6}$ | $-1.17 \cdot 10^{-3}$                   | $6.49 \cdot 10^{-4}$                   | $-5.65 \cdot 10^{-4}$                   | $1.07 \cdot 10^{-3}$                    | $-4.27 \cdot 10^{-3}$                  | 0.034                                   |

### Conversion of CF parameters from Wybourne to Stevens formalism

The CF parameters of Ln(trensals) determined by Riley *et al.*<sup>2,3</sup> are given within the Wybourne formalism. In this work we use the Stevens formalism, since we only interpret ground term properties, as we have not conducted optical spectroscopy studies that are outside the scope of this study.

In order to convert the Wybourne crystal field parameters,  $B_q^k(W)$  to Stevens crystal field parameters,  $B_k^q(S)$ , we use the definition of these latter as<sup>5</sup>:

$$B_k^q(S) = \langle J \| (\alpha, \beta, \gamma) \| J \rangle A_k^q \langle r^k \rangle$$

with  $\langle J \| (\alpha, \beta, \gamma) \| J \rangle$  reduced matrix elements, depending thus only on the tensor rank  $k$  ( $\langle J \| \alpha \| J \rangle$ ,  $\langle J \| \beta \| J \rangle$  and  $\langle J \| \gamma \| J \rangle$  for  $k = 2$ ,  $k = 4$  and  $k = 6$ , respectively) and the relation

$$B_q^k(W) = c_{k,q} A_k^q \langle r^k \rangle$$

from Table 6, page 171 in Handbook on The Physics and Chemistry of Rare Earths.<sup>6</sup>

Thus:

$$B_k^q(S) = \frac{B_q^k(W) \cdot \langle J \| (\alpha, \beta, \gamma) \| J \rangle}{c_{k,q}}$$

The numerical values of  $\langle J \| \alpha \| J \rangle$ ,  $\langle J \| \beta \| J \rangle$  and  $\langle J \| \gamma \| J \rangle$  are found in Table 20, page 874-875 in Abragam and Bleaney.<sup>5</sup>



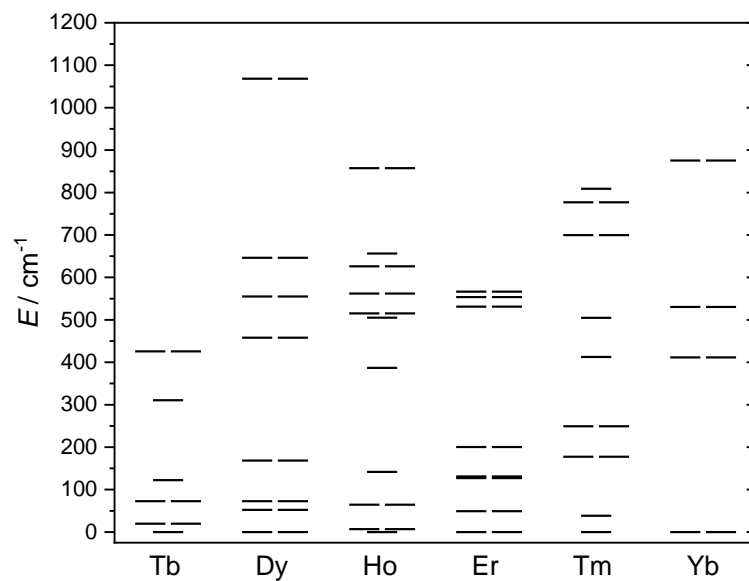

**Figure S36** Energy level splitting of the ground multiplet in **1-6**. The energy levels are determined using the CF parameters in Table S3.

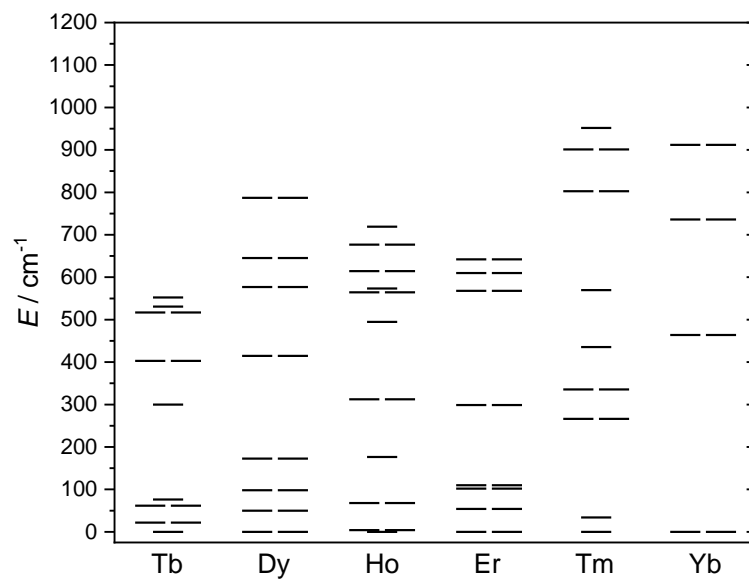

**Figure S37** Energy level splitting of the ground multiplet in selected Ln(trensal) complexes. The values of Er(trensal)<sup>3</sup> and Yb(trensal)<sup>4</sup> are from literature. The energy level splitting of the remaining complexes are calculated using the CF parameters in Table S1.

**Table S4** Energy levels (cm<sup>-1</sup>) of selected Ln(trensals) complexes and **1-6**. The energy levels are determined as described in the figure text of Figure S36 and S37.

| Tb(trensals) | Dy(trensals) | Ho(trensals) | Er(trensals) | Tm(trensals) | Yb(trensals) |
|--------------|--------------|--------------|--------------|--------------|--------------|
| 0            | 0            | 0            | 0            | 0            | 0            |
| 22           | 0            | 4            | 0            | 34           | 0            |
| 22           | 50           | 4            | 54           | 266          | 464          |
| 62           | 50           | 68           | 54           | 266          | 464          |
| 62           | 98           | 68           | 102          | 335          | 736          |
| 76           | 98           | 176          | 102          | 335          | 736          |
| 300          | 173          | 312          | 110          | 435          | 912          |
| 403          | 173          | 312          | 110          | 569          | 912          |
| 403          | 414          | 495          | 299          | 803          |              |
| 517          | 414          | 564          | 299          | 803          |              |
| 517          | 577          | 564          | 568          | 901          |              |
| 531          | 577          | 573          | 568          | 901          |              |
| 552          | 645          | 615          | 610          | 952          |              |
|              | 645          | 615          | 610          |              |              |
|              | 787          | 677          | 642          |              |              |
|              | 787          | 677          | 642          |              |              |
|              |              | 719          |              |              |              |
| <b>1</b>     | <b>2</b>     | <b>3</b>     | <b>4</b>     | <b>5</b>     | <b>6</b>     |
| 0            | 0            | 0            | 0            | 0            | 0            |
| 20           | 0            | 7            | 0            | 38           | 0            |
| 20           | 52           | 7            | 49           | 178          | 412          |
| 73           | 52           | 64           | 49           | 178          | 412          |
| 73           | 73           | 64           | 127          | 249          | 530          |
| 122          | 73           | 142          | 127          | 249          | 530          |
| 311          | 168          | 387          | 131          | 413          | 876          |
| 426          | 168          | 505          | 131          | 505          | 876          |
| 426          | 458          | 515          | 200          | 700          |              |
| 552          | 458          | 515          | 200          | 700          |              |
| 552          | 555          | 562          | 531          | 777          |              |
| 626          | 555          | 562          | 531          | 777          |              |
| 640          | 646          | 626          | 554          | 809          |              |
|              | 646          | 626          | 554          |              |              |
|              | 1068         | 656          | 567          |              |              |
|              | 1068         | 857          | 567          |              |              |
|              |              | 857          |              |              |              |

**Table S5** Eigenvector compositions of the energy levels ( $\text{cm}^{-1}$ ) in the ground multiplet of **1**

| $E$ | 0     | 20    | 20    | 73    | 73    | 122   | 311   | 426   | 426   | 552   | 552   | 626   | 640   |
|-----|-------|-------|-------|-------|-------|-------|-------|-------|-------|-------|-------|-------|-------|
| 6>  | 2.0%  | 0.0%  | 0.0%  | 0.0%  | 0.0%  | 5.9%  | 7.3%  | 0.0%  | 0.0%  | 0.0%  | 0.0%  | 44.1% | 40.7% |
| 5>  | 0.0%  | 6.3%  | 0.2%  | 12.6% | 0.5%  | 0.0%  | 0.0%  | 0.0%  | 1.7%  | 78.0% | 0.9%  | 0.0%  | 0.0%  |
| 4>  | 0.0%  | 0.3%  | 14.2% | 0.5%  | 13.7% | 0.0%  | 0.0%  | 69.2% | 1.4%  | 0.0%  | 0.6%  | 0.0%  | 0.0%  |
| 3>  | 18.9% | 0.0%  | 0.0%  | 0.0%  | 0.0%  | 43.9% | 22.5% | 0.0%  | 0.0%  | 0.0%  | 0.0%  | 5.9%  | 8.8%  |
| 2>  | 0.0%  | 21.8% | 0.5%  | 54.5% | 2.0%  | 0.0%  | 0.0%  | 0.0%  | 0.7%  | 20.2% | 0.2%  | 0.0%  | 0.0%  |
| 1>  | 0.0%  | 1.4%  | 55.3% | 0.6%  | 15.7% | 0.0%  | 0.0%  | 26.4% | 0.5%  | 0.0%  | 0.1%  | 0.0%  | 0.0%  |
| 0>  | 58.2% | 0.0%  | 0.0%  | 0.0%  | 0.0%  | 0.3%  | 40.4% | 0.0%  | 0.0%  | 0.0%  | 0.0%  | 0.0%  | 1.0%  |
| -1> | 0.0%  | 55.3% | 1.4%  | 15.7% | 0.6%  | 0.0%  | 0.0%  | 0.5%  | 26.4% | 0.1%  | 0.0%  | 0.0%  | 0.0%  |
| -2> | 0.0%  | 0.5%  | 21.8% | 2.0%  | 54.5% | 0.0%  | 0.0%  | 0.7%  | 0.0%  | 0.2%  | 20.2% | 0.0%  | 0.0%  |
| -3> | 18.9% | 0.0%  | 0.0%  | 0.0%  | 0.0%  | 43.9% | 22.5% | 0.0%  | 0.0%  | 0.0%  | 0.0%  | 5.9%  | 8.8%  |
| -4> | 0.0%  | 14.2% | 0.3%  | 13.7% | 0.5%  | 0.0%  | 0.0%  | 1.4%  | 69.2% | 0.6%  | 0.0%  | 0.0%  | 0.0%  |
| -5> | 0.0%  | 0.2%  | 6.3%  | 0.5%  | 12.6% | 0.0%  | 0.0%  | 1.7%  | 0.0%  | 0.9%  | 78.0% | 0.0%  | 0.0%  |
| -6> | 2.0%  | 0.0%  | 0.0%  | 0.0%  | 0.0%  | 5.9%  | 7.3%  | 0.0%  | 0.0%  | 0.0%  | 0.0%  | 44.1% | 40.7% |

**Table S6** Eigenvector compositions of the energy levels ( $\text{cm}^{-1}$ ) in the ground multiplet of **2**

| $E$    | 0     | 0     | 52    | 52    | 73    | 73    | 168   | 168   | 458   | 458   | 555   | 555   | 646   | 646   | 1068  | 1068  |
|--------|-------|-------|-------|-------|-------|-------|-------|-------|-------|-------|-------|-------|-------|-------|-------|-------|
| 15/2>  | 0.0%  | 0.0%  | 0.0%  | 1.3%  | 0.0%  | 0.0%  | 0.0%  | 0.0%  | 0.0%  | 7.8%  | 0.0%  | 0.0%  | 0.0%  | 0.0%  | 0.0%  | 90.8% |
| 13/2>  | 0.1%  | 10.5% | 0.0%  | 0.0%  | 3.3%  | 0.0%  | 0.0%  | 47.7% | 0.0%  | 0.0%  | 2.1%  | 0.0%  | 0.0%  | 36.3% | 0.0%  | 0.0%  |
| 11/2>  | 10.8% | 0.1%  | 0.0%  | 0.0%  | 0.0%  | 46.4% | 0.0%  | 0.0%  | 0.0%  | 0.0%  | 0.0%  | 41.5% | 1.1%  | 0.0%  | 0.0%  | 0.0%  |
| 9/2>   | 0.0%  | 0.0%  | 0.5%  | 37.0% | 0.0%  | 0.0%  | 0.0%  | 0.0%  | 0.2%  | 53.9% | 0.0%  | 0.0%  | 0.0%  | 0.0%  | 0.0%  | 8.4%  |
| 7/2>   | 0.3%  | 25.0% | 0.0%  | 0.0%  | 6.3%  | 0.0%  | 0.0%  | 13.0% | 0.0%  | 0.0%  | 1.0%  | 0.0%  | 0.0%  | 54.3% | 0.0%  | 0.0%  |
| 5/2>   | 23.5% | 0.3%  | 0.0%  | 0.0%  | 0.0%  | 20.8% | 2.0%  | 0.0%  | 0.0%  | 0.0%  | 0.0%  | 49.5% | 4.0%  | 0.0%  | 0.0%  | 0.0%  |
| 3/2>   | 0.0%  | 0.0%  | 2.6%  | 58.6% | 0.0%  | 0.0%  | 0.0%  | 0.0%  | 2.9%  | 35.2% | 0.0%  | 0.0%  | 0.0%  | 0.0%  | 0.0%  | 0.7%  |
| 1/2>   | 0.3%  | 29.2% | 0.0%  | 0.0%  | 23.2% | 0.0%  | 0.0%  | 37.2% | 0.0%  | 0.0%  | 5.8%  | 0.0%  | 0.0%  | 4.3%  | 0.0%  | 0.0%  |
| -1/2>  | 29.2% | 0.3%  | 0.0%  | 0.0%  | 0.0%  | 23.2% | 37.2% | 0.0%  | 0.0%  | 0.0%  | 0.0%  | 5.8%  | 4.3%  | 0.0%  | 0.0%  | 0.0%  |
| -3/2>  | 0.0%  | 0.0%  | 58.6% | 2.6%  | 0.0%  | 0.0%  | 0.0%  | 0.0%  | 35.2% | 2.9%  | 0.0%  | 0.0%  | 0.0%  | 0.0%  | 0.7%  | 0.0%  |
| -5/2>  | 0.3%  | 23.5% | 0.0%  | 0.0%  | 20.8% | 0.0%  | 0.0%  | 2.0%  | 0.0%  | 0.0%  | 49.5% | 0.0%  | 0.0%  | 4.0%  | 0.0%  | 0.0%  |
| -7/2>  | 25.0% | 0.3%  | 0.0%  | 0.0%  | 0.0%  | 6.3%  | 13.0% | 0.0%  | 0.0%  | 0.0%  | 0.0%  | 1.0%  | 54.3% | 0.0%  | 0.0%  | 0.0%  |
| -9/2>  | 0.0%  | 0.0%  | 37.0% | 0.5%  | 0.0%  | 0.0%  | 0.0%  | 0.0%  | 53.9% | 0.2%  | 0.0%  | 0.0%  | 0.0%  | 0.0%  | 8.4%  | 0.0%  |
| -11/2> | 0.1%  | 10.8% | 0.0%  | 0.0%  | 46.4% | 0.0%  | 0.0%  | 0.0%  | 0.0%  | 0.0%  | 41.5% | 0.0%  | 0.0%  | 1.1%  | 0.0%  | 0.0%  |
| -13/2> | 10.5% | 0.1%  | 0.0%  | 0.0%  | 0.0%  | 3.3%  | 47.7% | 0.0%  | 0.0%  | 0.0%  | 0.0%  | 2.1%  | 36.3% | 0.0%  | 0.0%  | 0.0%  |
| -15/2> | 0.0%  | 0.0%  | 1.3%  | 0.0%  | 0.0%  | 0.0%  | 0.0%  | 0.0%  | 7.8%  | 0.0%  | 0.0%  | 0.0%  | 0.0%  | 0.0%  | 90.8% | 0.0%  |

**Table S7** Eigenvector compositions of the energy levels (cm<sup>-1</sup>) in the ground multiplet of **3**

| <i>E</i> | 0     | 7     | 7     | 64    | 64    | 142   | 387   | 505   | 515   | 515   | 562   | 562   | 626   | 626   | 656   | 857   | 857   |
|----------|-------|-------|-------|-------|-------|-------|-------|-------|-------|-------|-------|-------|-------|-------|-------|-------|-------|
| 8>       | 0.0%  | 0.0%  | 0.2%  | 0.0%  | 0.6%  | 0.0%  | 0.0%  | 0.0%  | 0.1%  | 2.1%  | 0.0%  | 0.5%  | 0.0%  | 0.2%  | 0.0%  | 0.0%  | 96.3% |
| 7>       | 0.0%  | 1.0%  | 0.0%  | 0.9%  | 0.0%  | 0.0%  | 0.0%  | 0.0%  | 18.7% | 1.1%  | 68.3% | 2.6%  | 7.4%  | 0.0%  | 0.0%  | 0.0%  | 0.0%  |
| 6>       | 6.1%  | 0.0%  | 0.0%  | 0.0%  | 0.0%  | 19.7% | 42.1% | 29.4% | 0.0%  | 0.0%  | 0.0%  | 0.0%  | 0.0%  | 0.0%  | 2.6%  | 0.0%  | 0.0%  |
| 5>       | 0.0%  | 0.0%  | 19.4% | 0.2%  | 37.2% | 0.0%  | 0.0%  | 0.0%  | 1.7%  | 29.0% | 0.2%  | 4.2%  | 0.0%  | 5.4%  | 0.0%  | 0.0%  | 2.8%  |
| 4>       | 0.0%  | 34.4% | 0.0%  | 26.1% | 0.1%  | 0.0%  | 0.0%  | 0.0%  | 5.8%  | 0.3%  | 8.9%  | 0.3%  | 23.9% | 0.0%  | 0.0%  | 0.0%  | 0.0%  |
| 3>       | 31.6% | 0.0%  | 0.0%  | 0.0%  | 0.0%  | 23.9% | 4.8%  | 16.5% | 0.0%  | 0.0%  | 0.0%  | 0.0%  | 0.0%  | 0.0%  | 23.3% | 0.0%  | 0.0%  |
| 2>       | 0.0%  | 0.0%  | 24.3% | 0.1%  | 17.5% | 0.0%  | 0.0%  | 0.0%  | 1.6%  | 26.6% | 0.4%  | 10.3% | 0.0%  | 18.4% | 0.0%  | 0.0%  | 0.7%  |
| 1>       | 0.0%  | 20.8% | 0.0%  | 17.2% | 0.1%  | 0.0%  | 0.0%  | 0.0%  | 12.2% | 0.7%  | 4.1%  | 0.2%  | 44.6% | 0.0%  | 0.0%  | 0.1%  | 0.0%  |
| 0>       | 24.6% | 0.0%  | 0.0%  | 0.0%  | 0.0%  | 12.8% | 6.1%  | 8.3%  | 0.0%  | 0.0%  | 0.0%  | 0.0%  | 0.0%  | 0.0%  | 48.2% | 0.0%  | 0.0%  |
| -1>      | 0.0%  | 0.0%  | 20.8% | 0.1%  | 17.2% | 0.0%  | 0.0%  | 0.0%  | 0.7%  | 12.2% | 0.2%  | 4.1%  | 0.0%  | 44.6% | 0.0%  | 0.0%  | 0.1%  |
| -2>      | 0.0%  | 24.3% | 0.0%  | 17.5% | 0.1%  | 0.0%  | 0.0%  | 0.0%  | 26.6% | 1.6%  | 10.3% | 0.4%  | 18.4% | 0.0%  | 0.0%  | 0.7%  | 0.0%  |
| -3>      | 31.6% | 0.0%  | 0.0%  | 0.0%  | 0.0%  | 23.9% | 4.8%  | 16.5% | 0.0%  | 0.0%  | 0.0%  | 0.0%  | 0.0%  | 0.0%  | 23.3% | 0.0%  | 0.0%  |
| -4>      | 0.0%  | 0.0%  | 34.4% | 0.1%  | 26.1% | 0.0%  | 0.0%  | 0.0%  | 0.3%  | 5.8%  | 0.3%  | 8.9%  | 0.0%  | 23.9% | 0.0%  | 0.0%  | 0.0%  |
| -5>      | 0.0%  | 19.4% | 0.0%  | 37.2% | 0.2%  | 0.0%  | 0.0%  | 0.0%  | 29.0% | 1.7%  | 4.2%  | 0.2%  | 5.4%  | 0.0%  | 0.0%  | 2.8%  | 0.0%  |
| -6>      | 6.1%  | 0.0%  | 0.0%  | 0.0%  | 0.0%  | 19.7% | 42.1% | 29.4% | 0.0%  | 0.0%  | 0.0%  | 0.0%  | 0.0%  | 0.0%  | 2.6%  | 0.0%  | 0.0%  |
| -7>      | 0.0%  | 0.0%  | 1.0%  | 0.0%  | 0.9%  | 0.0%  | 0.0%  | 0.0%  | 1.1%  | 18.7% | 2.6%  | 68.3% | 0.0%  | 7.4%  | 0.0%  | 0.0%  | 0.0%  |
| -8>      | 0.0%  | 0.2%  | 0.0%  | 0.6%  | 0.0%  | 0.0%  | 0.0%  | 0.0%  | 2.1%  | 0.1%  | 0.5%  | 0.0%  | 0.2%  | 0.0%  | 0.0%  | 96.3% | 0.0%  |

**Table S8** Eigenvector compositions of the energy levels (cm<sup>-1</sup>) in the ground multiplet of **4**

| <i>E</i> | 0     | 0     | 49    | 49    | 127   | 127   | 131   | 131   | 200   | 200   | 531   | 531   | 554   | 554   | 567   | 567   |
|----------|-------|-------|-------|-------|-------|-------|-------|-------|-------|-------|-------|-------|-------|-------|-------|-------|
| 15/2>    | 0.0%  | 0.0%  | 0.4%  | 11.7% | 0.0%  | 87.1% | 0.0%  | 0.0%  | 0.0%  | 0.0%  | 0.0%  | 0.0%  | 0.0%  | 0.9%  | 0.0%  | 0.0%  |
| 13/2>    | 1.8%  | 1.5%  | 0.0%  | 0.0%  | 0.0%  | 0.0%  | 11.1% | 1.0%  | 0.1%  | 71.5% | 0.3%  | 8.6%  | 0.0%  | 0.0%  | 2.1%  | 1.9%  |
| 11/2>    | 1.9%  | 2.3%  | 0.0%  | 0.0%  | 0.0%  | 0.0%  | 4.3%  | 45.3% | 9.5%  | 0.0%  | 12.2% | 0.4%  | 0.0%  | 0.0%  | 11.5% | 12.6% |
| 9/2>     | 0.0%  | 0.0%  | 2.6%  | 40.7% | 1.2%  | 4.4%  | 0.0%  | 0.0%  | 0.0%  | 0.0%  | 0.0%  | 0.0%  | 1.8%  | 49.3% | 0.0%  | 0.0%  |
| 7/2>     | 19.2% | 16.4% | 0.0%  | 0.0%  | 0.0%  | 0.0%  | 4.4%  | 0.4%  | 0.0%  | 4.2%  | 1.5%  | 41.4% | 0.0%  | 0.0%  | 6.6%  | 6.0%  |
| 5/2>     | 14.1% | 16.5% | 0.0%  | 0.0%  | 0.0%  | 0.0%  | 1.2%  | 12.9% | 4.1%  | 0.0%  | 26.9% | 1.0%  | 0.0%  | 0.0%  | 11.1% | 12.2% |
| 3/2>     | 0.0%  | 0.0%  | 7.4%  | 37.3% | 1.9%  | 5.4%  | 0.0%  | 0.0%  | 0.0%  | 0.0%  | 0.0%  | 0.0%  | 5.4%  | 42.6% | 0.0%  | 0.0%  |
| 1/2>     | 14.2% | 12.1% | 0.0%  | 0.0%  | 0.0%  | 0.0%  | 17.8% | 1.7%  | 0.0%  | 10.6% | 0.3%  | 7.3%  | 0.0%  | 0.0%  | 18.8% | 17.1% |
| -1/2>    | 12.1% | 14.2% | 0.0%  | 0.0%  | 0.0%  | 0.0%  | 1.7%  | 17.8% | 10.6% | 0.0%  | 7.3%  | 0.3%  | 0.0%  | 0.0%  | 17.1% | 18.8% |
| -3/2>    | 0.0%  | 0.0%  | 37.3% | 7.4%  | 5.4%  | 1.9%  | 0.0%  | 0.0%  | 0.0%  | 0.0%  | 0.0%  | 0.0%  | 42.6% | 5.4%  | 0.0%  | 0.0%  |
| -5/2>    | 16.5% | 14.1% | 0.0%  | 0.0%  | 0.0%  | 0.0%  | 12.9% | 1.2%  | 0.0%  | 4.1%  | 1.0%  | 26.9% | 0.0%  | 0.0%  | 12.2% | 11.1% |
| -7/2>    | 16.4% | 19.2% | 0.0%  | 0.0%  | 0.0%  | 0.0%  | 0.4%  | 4.4%  | 4.2%  | 0.0%  | 41.4% | 1.5%  | 0.0%  | 0.0%  | 6.0%  | 6.6%  |
| -9/2>    | 0.0%  | 0.0%  | 40.7% | 2.6%  | 4.4%  | 1.2%  | 0.0%  | 0.0%  | 0.0%  | 0.0%  | 0.0%  | 0.0%  | 49.3% | 1.8%  | 0.0%  | 0.0%  |
| -11/2>   | 2.3%  | 1.9%  | 0.0%  | 0.0%  | 0.0%  | 0.0%  | 45.3% | 4.3%  | 0.0%  | 9.5%  | 0.4%  | 12.2% | 0.0%  | 0.0%  | 12.6% | 11.5% |
| -13/2>   | 1.5%  | 1.8%  | 0.0%  | 0.0%  | 0.0%  | 0.0%  | 1.0%  | 11.1% | 71.5% | 0.1%  | 8.6%  | 0.3%  | 0.0%  | 0.0%  | 1.9%  | 2.1%  |
| -15/2>   | 0.0%  | 0.0%  | 11.7% | 0.4%  | 87.1% | 0.0%  | 0.0%  | 0.0%  | 0.0%  | 0.0%  | 0.0%  | 0.0%  | 0.9%  | 0.0%  | 0.0%  | 0.0%  |

**Table S9** Eigenvector compositions of the energy levels ( $\text{cm}^{-1}$ ) in the ground multiplet of **5**

| <i>E</i> | 0     | 38    | 178   | 178   | 249   | 249   | 413   | 505   | 700   | 700   | 777   | 777   | 809   |
|----------|-------|-------|-------|-------|-------|-------|-------|-------|-------|-------|-------|-------|-------|
| 6>       | 31.2% | 37.7% | 0.0%  | 0.0%  | 0.0%  | 0.0%  | 18.8% | 11.7% | 0.0%  | 0.0%  | 0.0%  | 0.0%  | 0.7%  |
| 5>       | 0.0%  | 0.0%  | 33.4% | 12.0% | 2.9%  | 7.9%  | 0.0%  | 0.0%  | 0.8%  | 41.5% | 1.1%  | 0.4%  | 0.0%  |
| 4>       | 0.0%  | 0.0%  | 2.9%  | 8.2%  | 44.0% | 16.1% | 0.0%  | 0.0%  | 0.9%  | 0.0%  | 7.2%  | 20.7% | 0.0%  |
| 3>       | 18.1% | 10.1% | 0.0%  | 0.0%  | 0.0%  | 0.0%  | 28.9% | 22.9% | 0.0%  | 0.0%  | 0.0%  | 0.0%  | 20.0% |
| 2>       | 0.0%  | 0.0%  | 30.4% | 10.9% | 0.4%  | 1.1%  | 0.0%  | 0.0%  | 0.7%  | 36.8% | 14.6% | 5.1%  | 0.0%  |
| 1>       | 0.0%  | 0.0%  | 0.6%  | 1.6%  | 20.3% | 7.4%  | 0.0%  | 0.0%  | 18.8% | 0.4%  | 13.1% | 37.7% | 0.0%  |
| 0>       | 1.5%  | 4.4%  | 0.0%  | 0.0%  | 0.0%  | 0.0%  | 4.6%  | 30.9% | 0.0%  | 0.0%  | 0.0%  | 0.0%  | 58.6% |
| -1>      | 0.0%  | 0.0%  | 1.6%  | 0.6%  | 7.4%  | 20.3% | 0.0%  | 0.0%  | 0.4%  | 18.8% | 37.7% | 13.1% | 0.0%  |
| -2>      | 0.0%  | 0.0%  | 10.9% | 30.4% | 1.1%  | 0.4%  | 0.0%  | 0.0%  | 36.8% | 0.7%  | 5.1%  | 14.6% | 0.0%  |
| -3>      | 18.1% | 10.1% | 0.0%  | 0.0%  | 0.0%  | 0.0%  | 28.9% | 22.9% | 0.0%  | 0.0%  | 0.0%  | 0.0%  | 20.0% |
| -4>      | 0.0%  | 0.0%  | 8.2%  | 2.9%  | 16.1% | 44.0% | 0.0%  | 0.0%  | 0.0%  | 0.9%  | 20.7% | 7.2%  | 0.0%  |
| -5>      | 0.0%  | 0.0%  | 12.0% | 33.4% | 7.9%  | 2.9%  | 0.0%  | 0.0%  | 41.5% | 0.8%  | 0.4%  | 1.1%  | 0.0%  |
| -6>      | 31.2% | 37.7% | 0.0%  | 0.0%  | 0.0%  | 0.0%  | 18.8% | 11.7% | 0.0%  | 0.0%  | 0.0%  | 0.0%  | 0.7%  |

**Table S10** Eigenvector compositions of the energy levels ( $\text{cm}^{-1}$ ) in the ground multiplet of **6**

| <i>E</i> | 0     | 0     | 412   | 412   | 530   | 530   | 876   | 876   |
|----------|-------|-------|-------|-------|-------|-------|-------|-------|
| 7/2>     | 48.4% | 0.2%  | 28.1% | 8.8%  | 0.0%  | 0.0%  | 0.0%  | 14.5% |
| 5/2>     | 0.1%  | 19.4% | 13.1% | 41.9% | 0.0%  | 0.0%  | 25.5% | 0.0%  |
| 3/2>     | 0.0%  | 0.0%  | 0.0%  | 0.0%  | 0.4%  | 99.6% | 0.0%  | 0.0%  |
| 1/2>     | 31.8% | 0.1%  | 6.1%  | 1.9%  | 0.0%  | 0.0%  | 0.0%  | 60.0% |
| -1/2>    | 0.1%  | 31.8% | 1.9%  | 6.1%  | 0.0%  | 0.0%  | 60.0% | 0.0%  |
| -3/2>    | 0.0%  | 0.0%  | 0.0%  | 0.0%  | 99.6% | 0.4%  | 0.0%  | 0.0%  |
| -5/2>    | 19.4% | 0.1%  | 41.9% | 13.1% | 0.0%  | 0.0%  | 0.0%  | 25.5% |
| -7/2>    | 0.2%  | 48.4% | 8.8%  | 28.1% | 0.0%  | 0.0%  | 14.5% | 0.0%  |

## Ac susceptibility

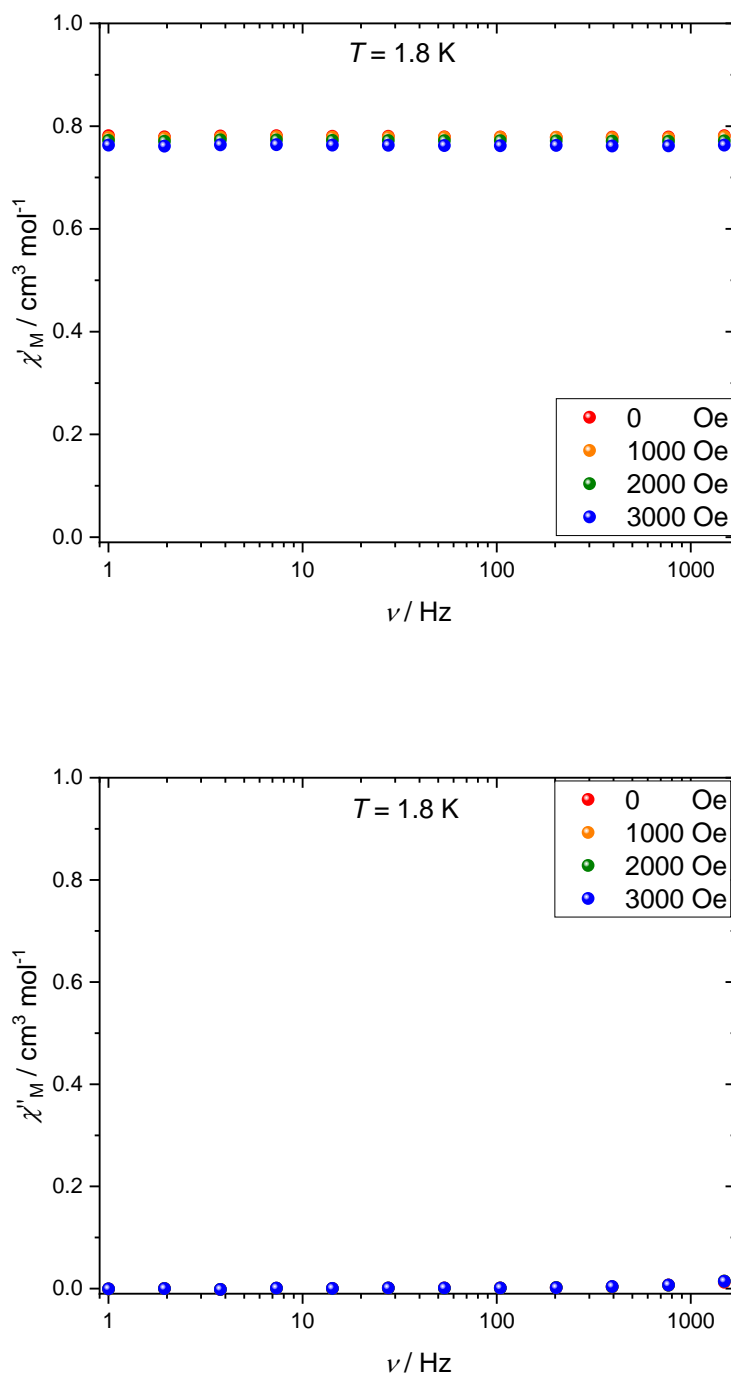

**Figure S38** In-phase (top) and out-of-phase (bottom) ac susceptibility response of **1** in the frequency range 1-1500 Hz at varying static magnetic fields.

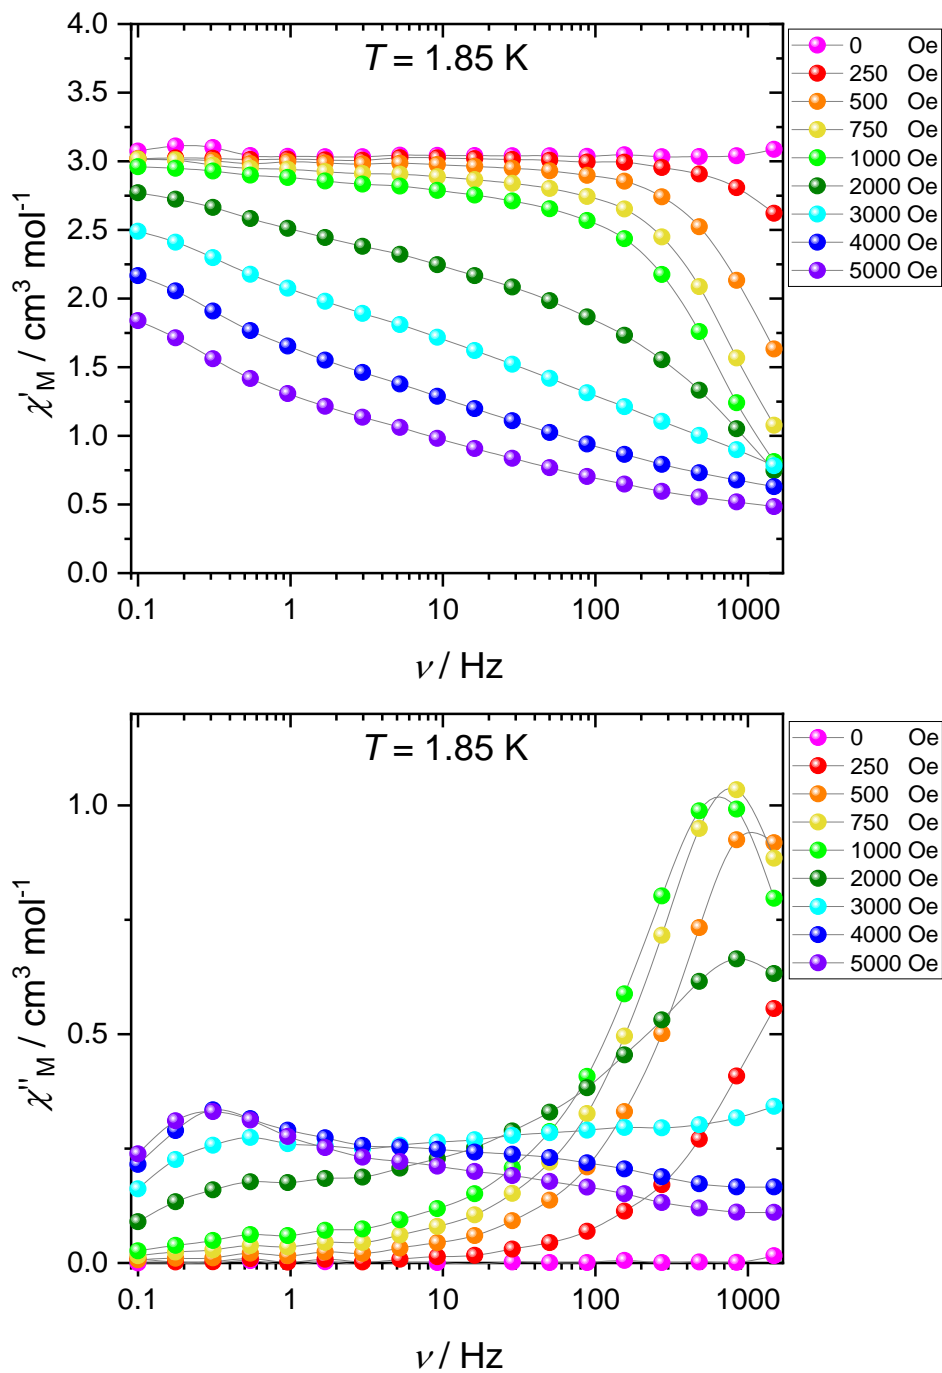

**Figure S39** In-phase (top) and out-of-phase (bottom) ac susceptibility response of **2** in the frequency range 0.1-1500 Hz at varying static magnetic fields. Solid lines are guidelines for the eye.

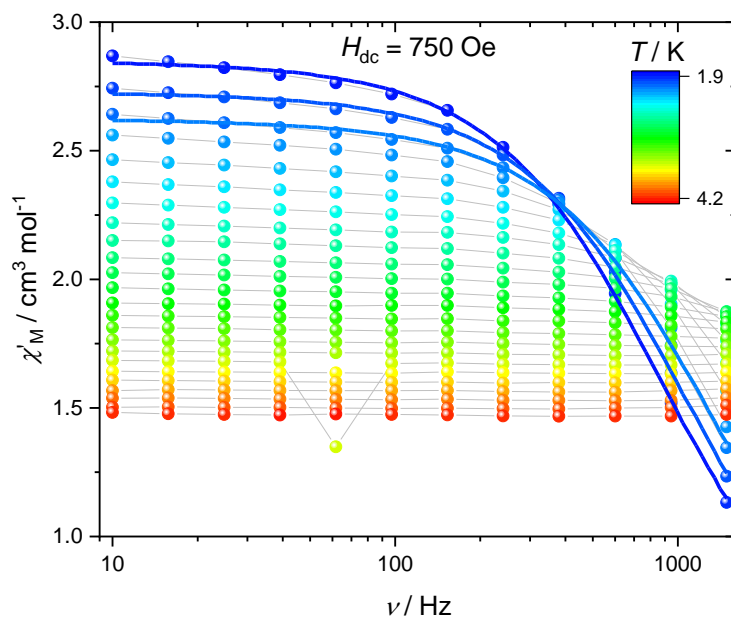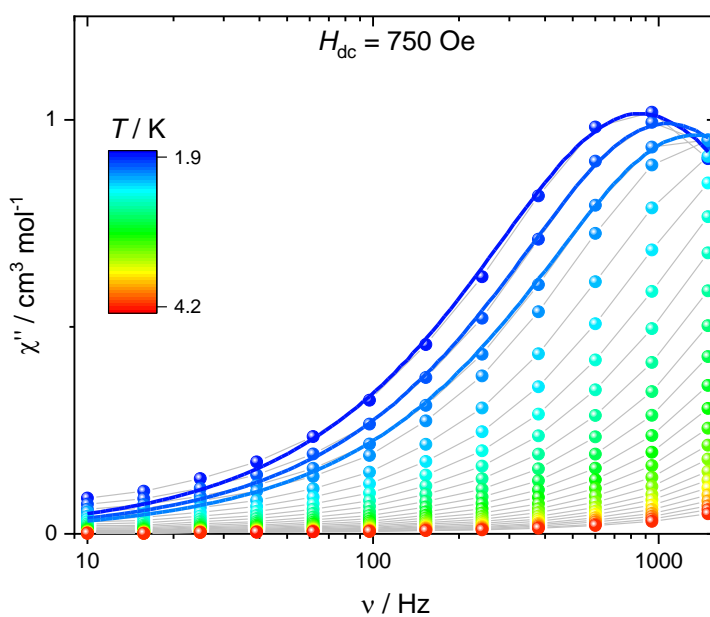

**Figure S40** Temperature dependence of the in-phase (top) and out-of-phase (bottom) ac susceptibility response of **2** in the frequency range 10-1500 Hz under an applied static magnetic field of 750 Oe. Grey lines are guidelines for the eye while the colored lines are fits to a generalised Debye model as described in the main text.



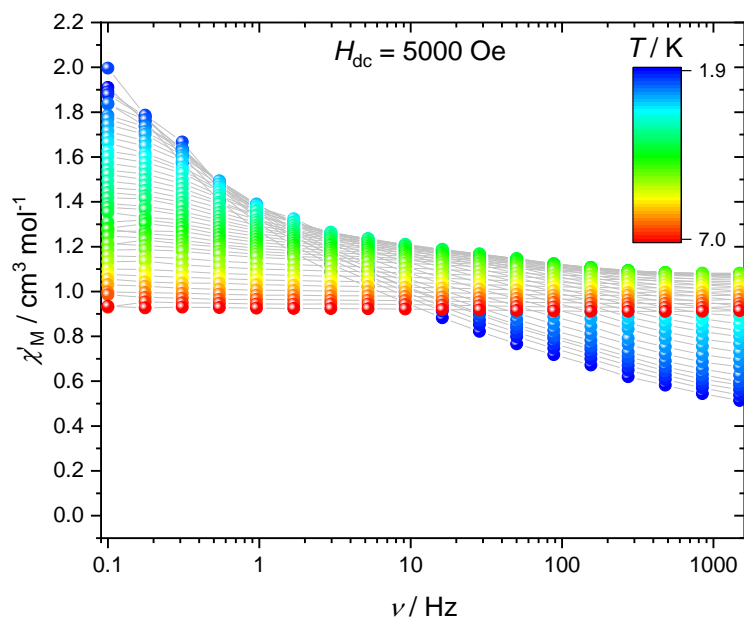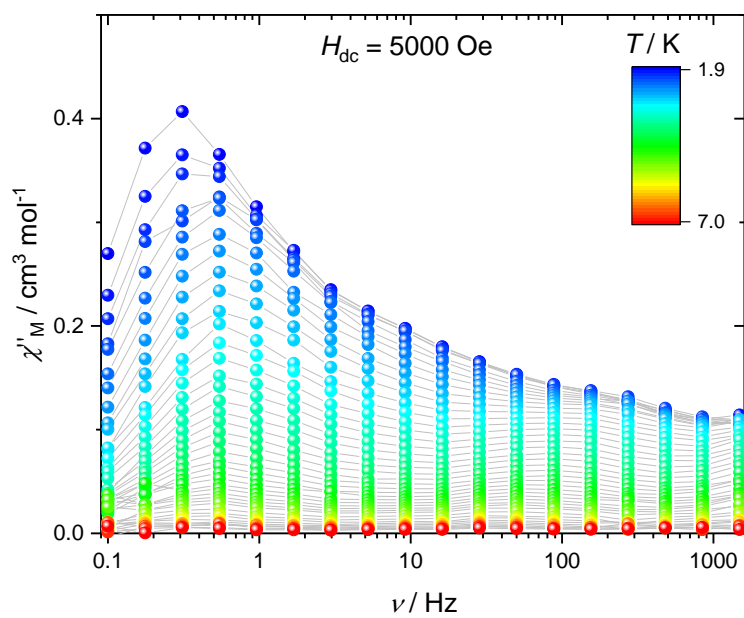

**Figure S41** Temperature dependence of the in-phase (top) and out-of-phase (bottom) ac susceptibility response of **2** in the frequency range 0.1-1500 Hz under an applied static magnetic field of 5000 Oe. Solid lines are guidelines for the eye.

**Table S11** Relaxation times and  $\alpha$  parameters extracted by fitting a generalised Debye model to the ac susceptibility data of **2** measured under an applied field of 750 Oe.

| <b>Temp / K</b> | <b><math>\tau</math> / ms</b> | <b><math>\alpha</math></b> |
|-----------------|-------------------------------|----------------------------|
| 1.9             | 0.185                         | 0.125                      |
| 2.0             | 0.149                         | 0.119                      |
| 2.1             | 0.119                         | 0.123                      |

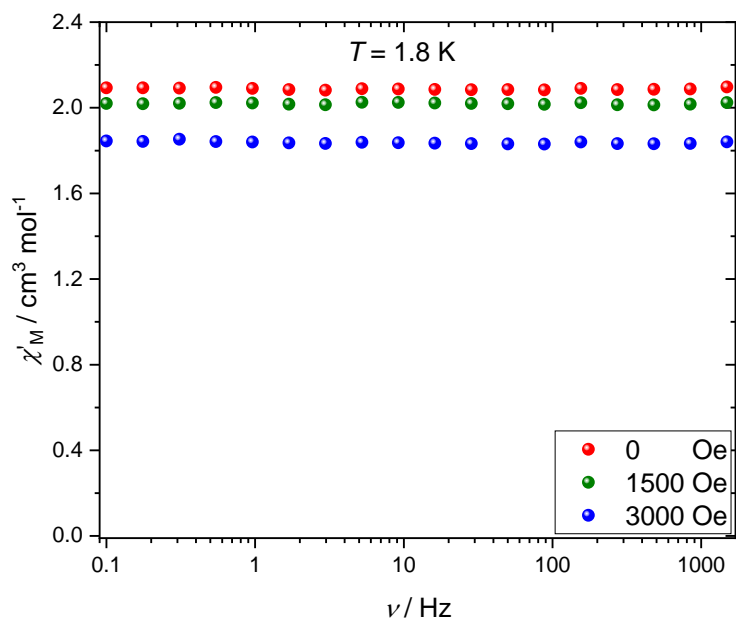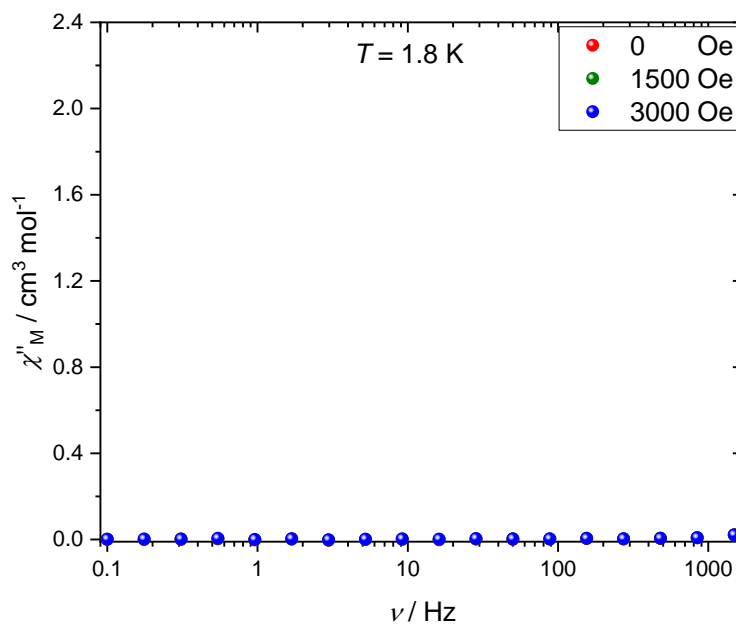

**Figure S42** In-phase (top) and out-of-phase (bottom) ac susceptibility response of **3** in the frequency range 0.1-1500 Hz at varying static magnetic fields.

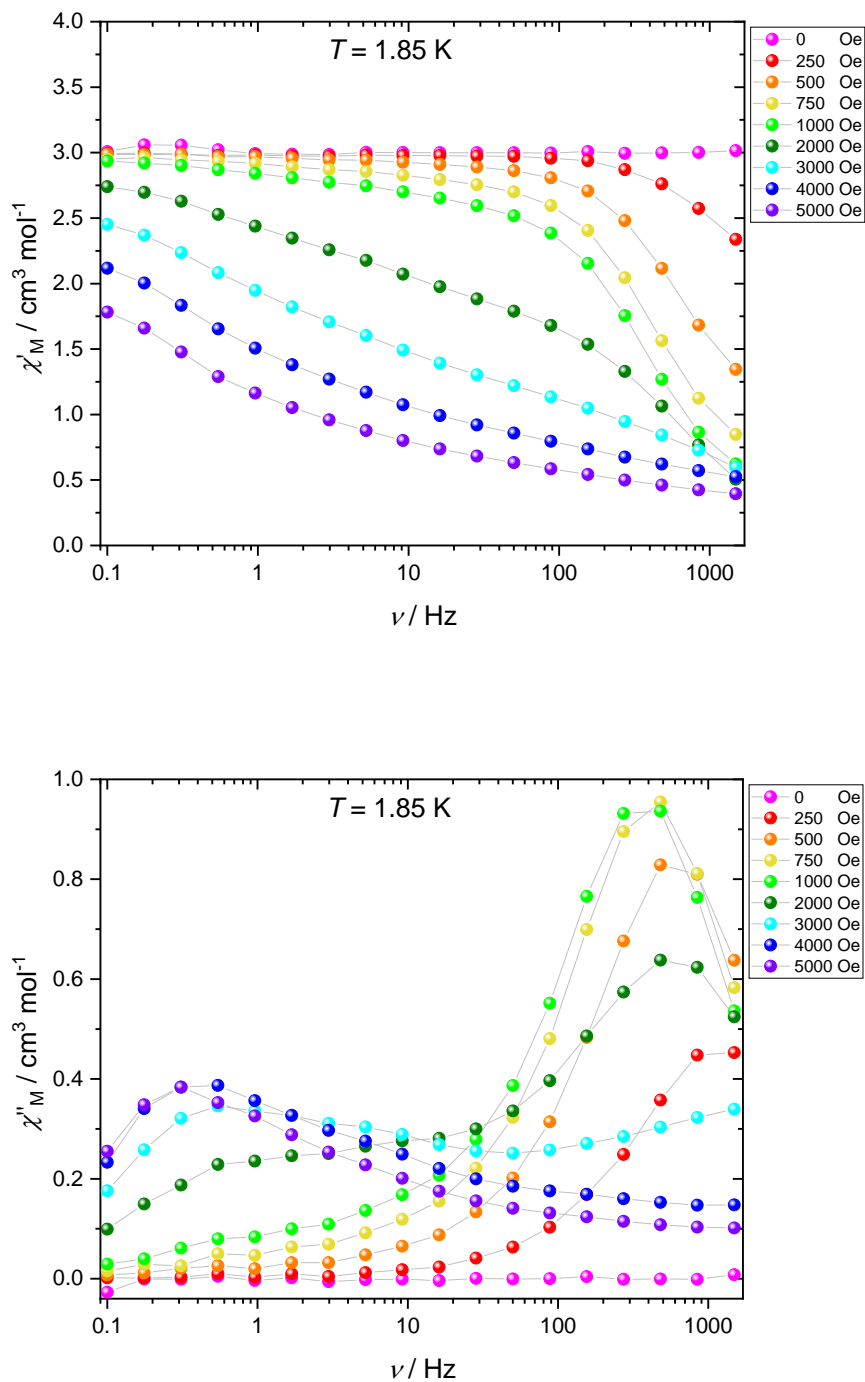

**Figure S43** In-phase (top) and out-of-phase (bottom) ac susceptibility response of **4** in the frequency range 0.1-1500 Hz at varying static magnetic fields. Solid lines are guidelines for the eye.

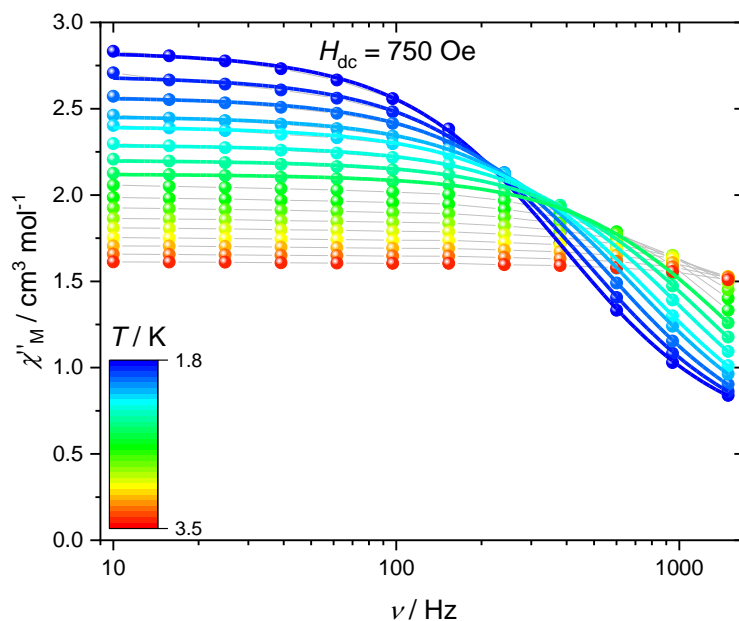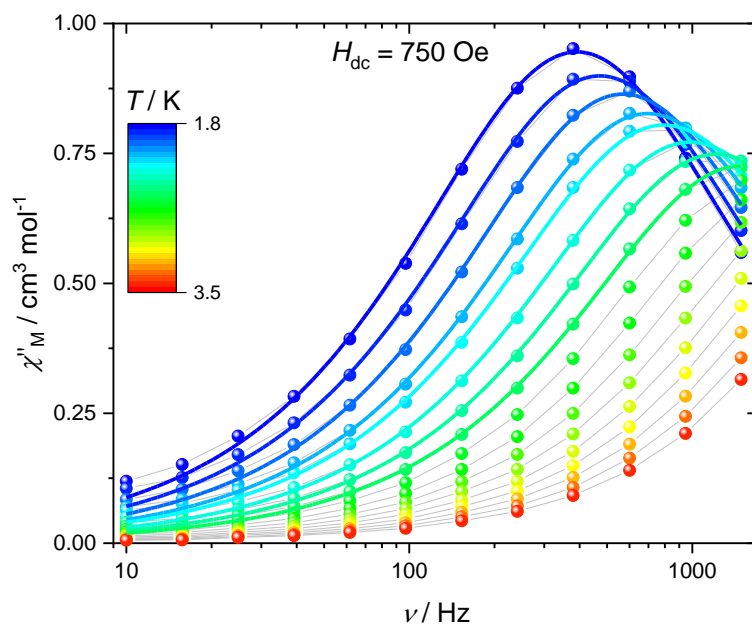

**Figure S44** Temperature dependence of the in-phase (top) and out-of-phase (bottom) ac susceptibility response of **4** in the frequency range 10-1500 Hz under an applied static magnetic field of 750 Oe. Grey lines are guidelines for the eye while the colored lines are fits to a generalised Debye model as described in the main text.

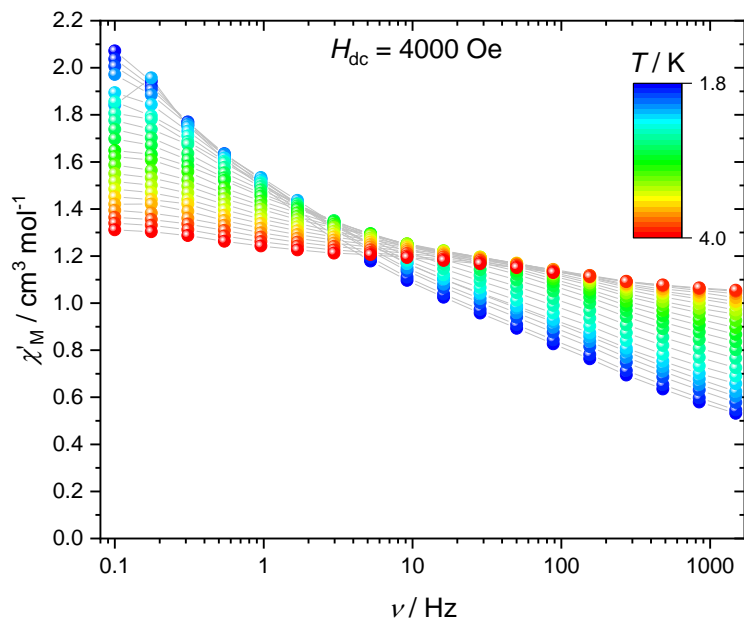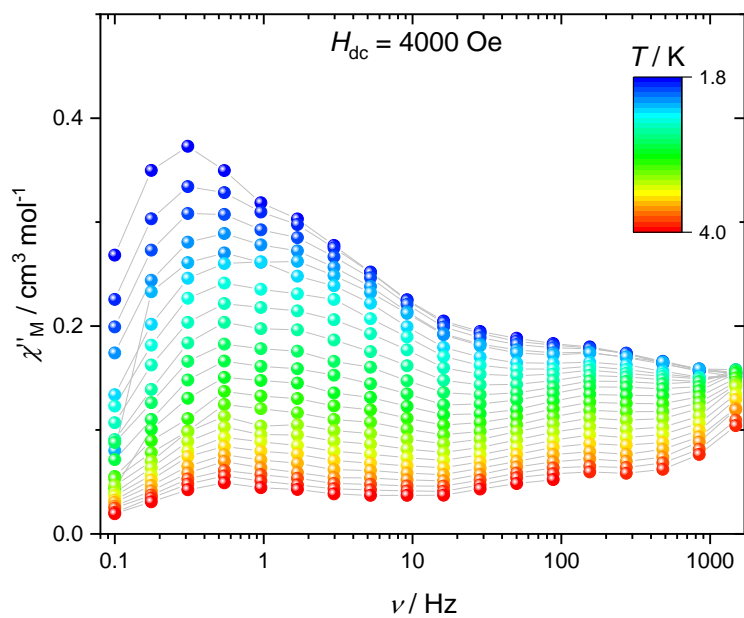

**Figure S45** Temperature dependence of the in-phase (top) and out-of-phase (bottom) ac susceptibility response of **4** in the frequency range 0.1-1500 Hz under an applied static magnetic field of 4000 Oe. Grey lines are guidelines for the eye.

**Table S12** Relaxation times and  $\alpha$  parameters extracted by fitting a generalised Debye model to the ac susceptibility data of **4** measured under an applied field of 750 Oe.

| <b>Temp / K</b> | <b><math>\tau</math> / ms</b> | <b><math>\alpha</math></b> |
|-----------------|-------------------------------|----------------------------|
| 1.8             | 0.407                         | 0.121                      |
| 1.9             | 0.338                         | 0.120                      |
| 2.0             | 0.279                         | 0.114                      |
| 2.1             | 0.229                         | 0.114                      |
| 2.2             | 0.200                         | 0.118                      |
| 2.3             | 0.162                         | 0.112                      |
| 2.4             | 0.131                         | 0.110                      |
| 2.5             | 0.107                         | 0.107                      |

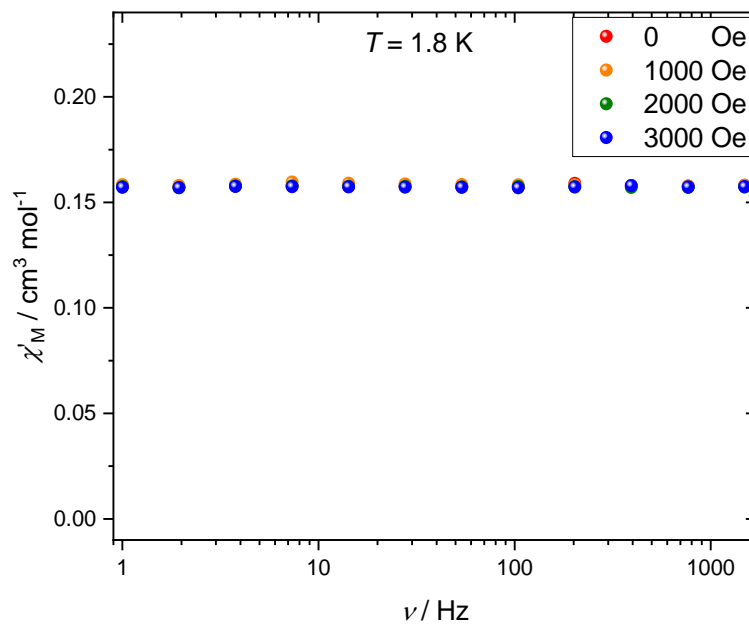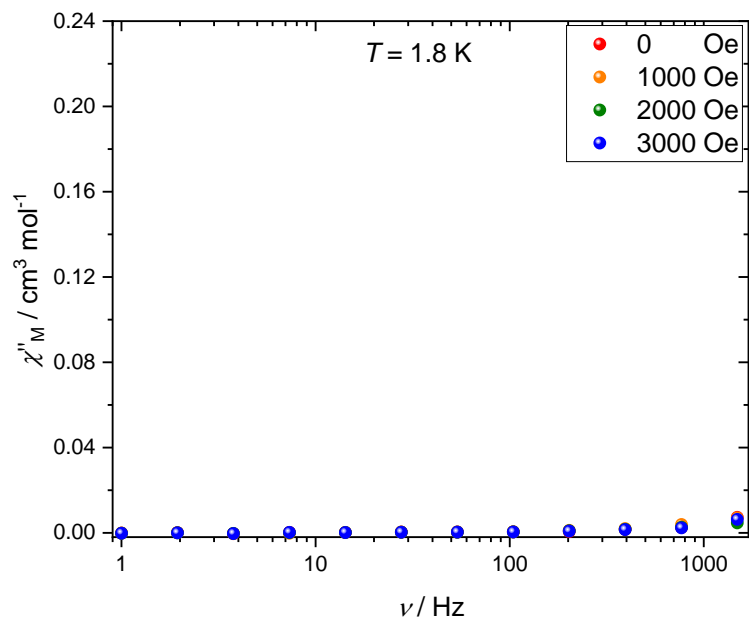

**Figure S46** In-phase (top) and out-of-phase (bottom) ac susceptibility response of **5** in the frequency range 1-1500 Hz at varying static magnetic fields.



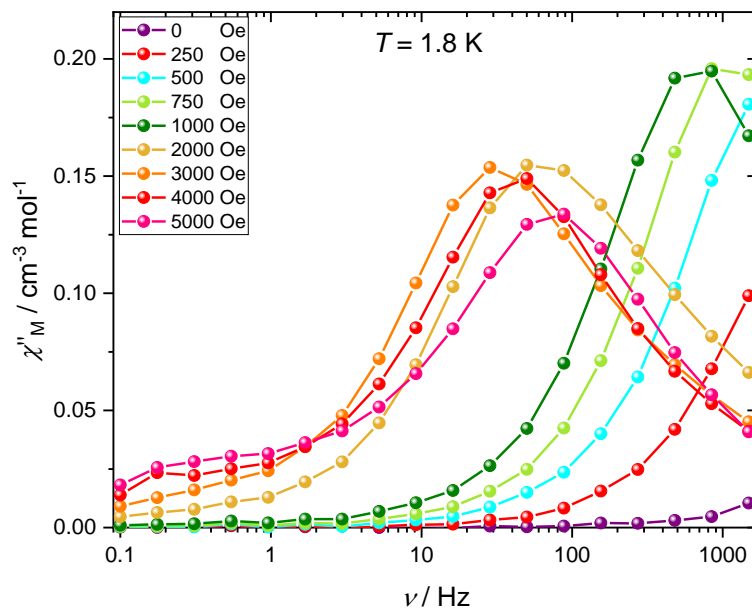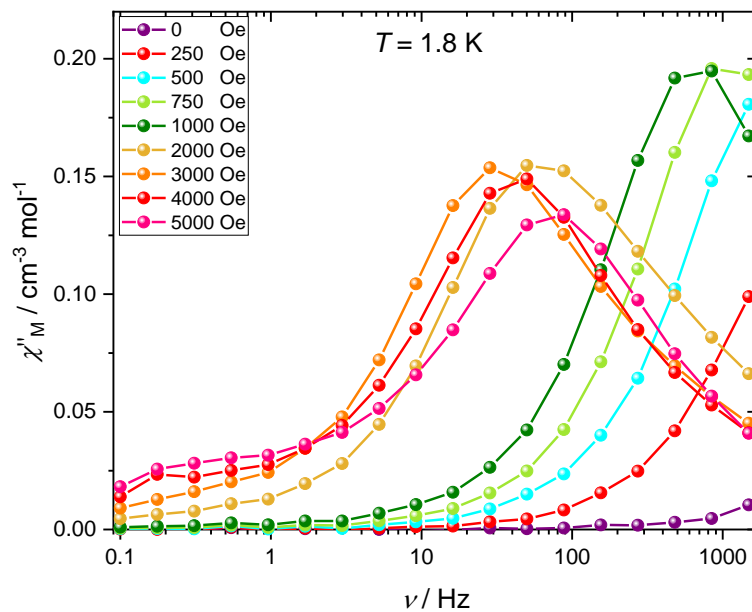

**Figure S47** In-phase (top) and out-of-phase (bottom) ac susceptibility response of **6** in the frequency range 0.1-1500 Hz at varying static magnetic fields. Solid lines are guidelines for the eye.

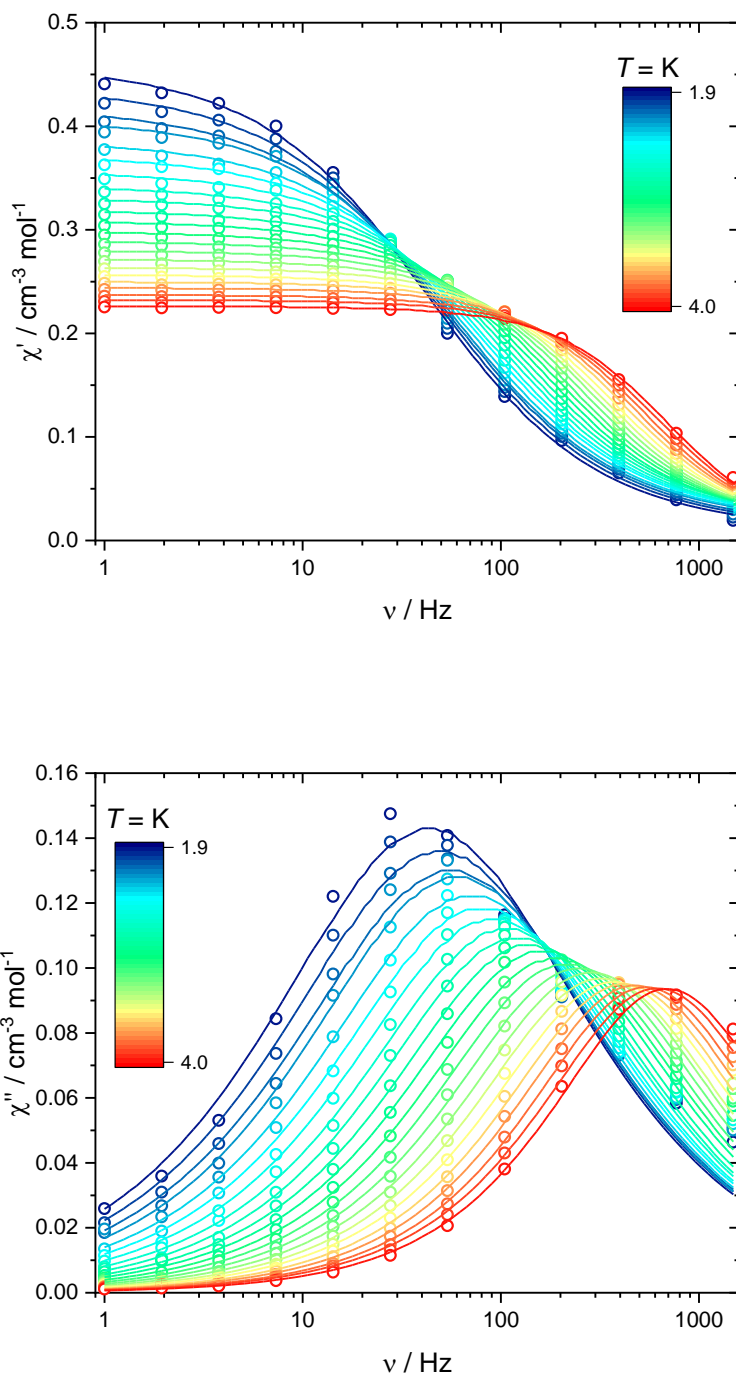

**Figure S48** Temperature dependence of the in-phase (top) and out-of-phase (bottom) ac susceptibility response of **6** in the frequency range 1-1500 Hz under an applied static magnetic field of 3000 Oe. Colored lines are fits to a generalised Debye model as described in the main text.

**Table S13** Relaxation times and  $\alpha$  parameters extracted by fitting a generalised Debye model to the ac susceptibility data of **6** measured under an applied field of 3000 Oe.

| Temp / K | $\tau$ / ms | $\alpha$ |
|----------|-------------|----------|
| 1.9      | 3.66        | 0.284    |
| 2.0      | 3.22        | 0.282    |
| 2.1      | 2.84        | 0.278    |
| 2.2      | 2.64        | 0.264    |
| 2.3      | 2.26        | 0.258    |
| 2.4      | 1.98        | 0.251    |
| 2.5      | 1.73        | 0.240    |
| 2.6      | 1.49        | 0.230    |
| 2.7      | 1.32        | 0.219    |
| 2.8      | 1.14        | 0.209    |
| 2.9      | 0.980       | 0.205    |
| 3.0      | 0.851       | 0.196    |
| 3.1      | 0.742       | 0.186    |
| 3.2      | 0.643       | 0.178    |
| 3.3      | 0.558       | 0.170    |
| 3.4      | 0.496       | 0.161    |
| 3.5      | 0.430       | 0.157    |
| 3.6      | 0.380       | 0.144    |
| 3.7      | 0.335       | 0.136    |
| 3.8      | 0.296       | 0.125    |
| 3.9      | 0.259       | 0.127    |
| 4.0      | 0.232       | 0.114    |

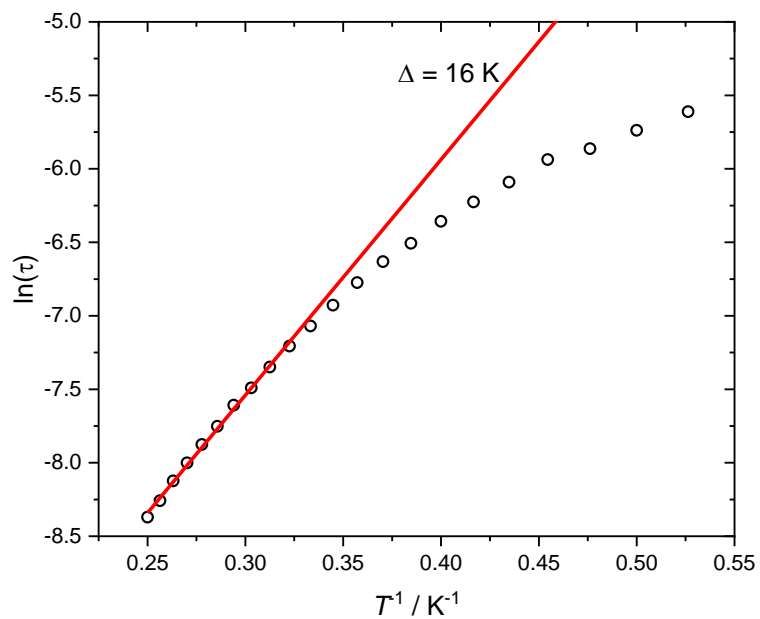

**Figure S49** Relaxation times ( $\tau$ ) obtained for **6** by fitting the ac susceptibility to the generalised Debye model described in the main text. The red line is a fit to an Arrhenius function.

## Preparation from MeCN

### Synthesis of **4**

DFMP (0.40 g; 2.4 mmol) and  $\text{Er}(\text{OTf})_3 \cdot 6\text{H}_2\text{O}$  (0.57 g; 0.79 mmol) were dissolved in hot MeCN (150 ml). To this was added dropwise a solution of tren (0.23 g; 1.6 mmol) in MeOH (25 ml) over 45 min. The solution was then boiled for 1 hour while being reduced to a volume of ca. 150 ml. Then a solution of  $\text{Et}_3\text{N}$  (0.4 ml; 3 mmol) in MeCN (10 ml) was added slowly. The orange solution was then left for a week at room temperature producing a yellow precipitate. This was isolated and washed 3 times with EtOH and 3 times with diethyl ether.

Yield: 0.35 g (47 %). Anal. Calcd. for  $\text{C}_{39}\text{H}_{53}\text{N}_8\text{O}_7\text{Er}$ : C, 51.30; H, 5.85; N, 12.27. Found: C, 51.56; H, 5.59; N, 12.26.

**5** was prepared analogously. Yield: 0.32 g (42 %). Anal. Calcd. for  $\text{C}_{39}\text{H}_{53}\text{N}_8\text{O}_7\text{Tm}$ : C, 51.20; H, 5.84; N, 12.25. Found: C, 51.33; H, 5.55; N, 12.15.

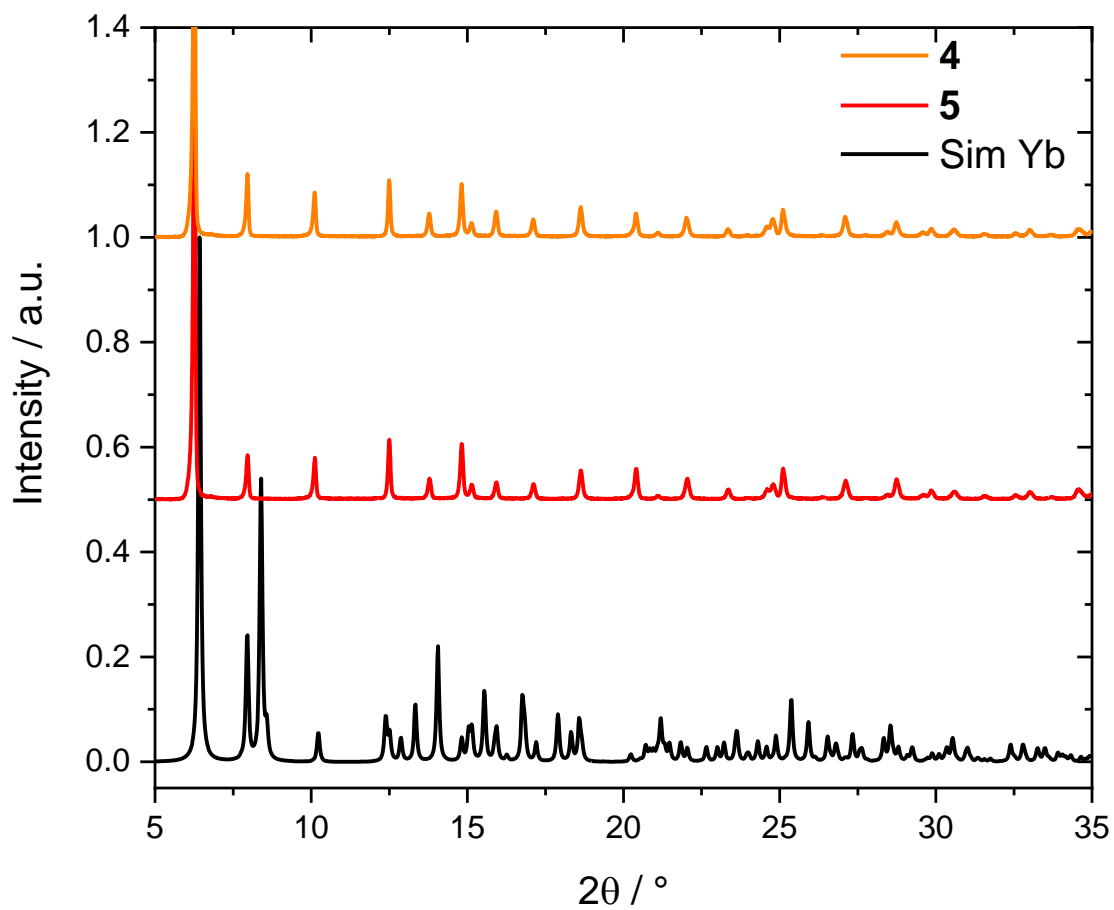

**Figure S50** PXR D of **4** and **5** prepared from MeCN instead of MeCN/CHCl<sub>3</sub>. The simulation is based on a crystal structure of **6** (prepared from a MeCN/CHCl<sub>3</sub> mixture) measured at room temperature.

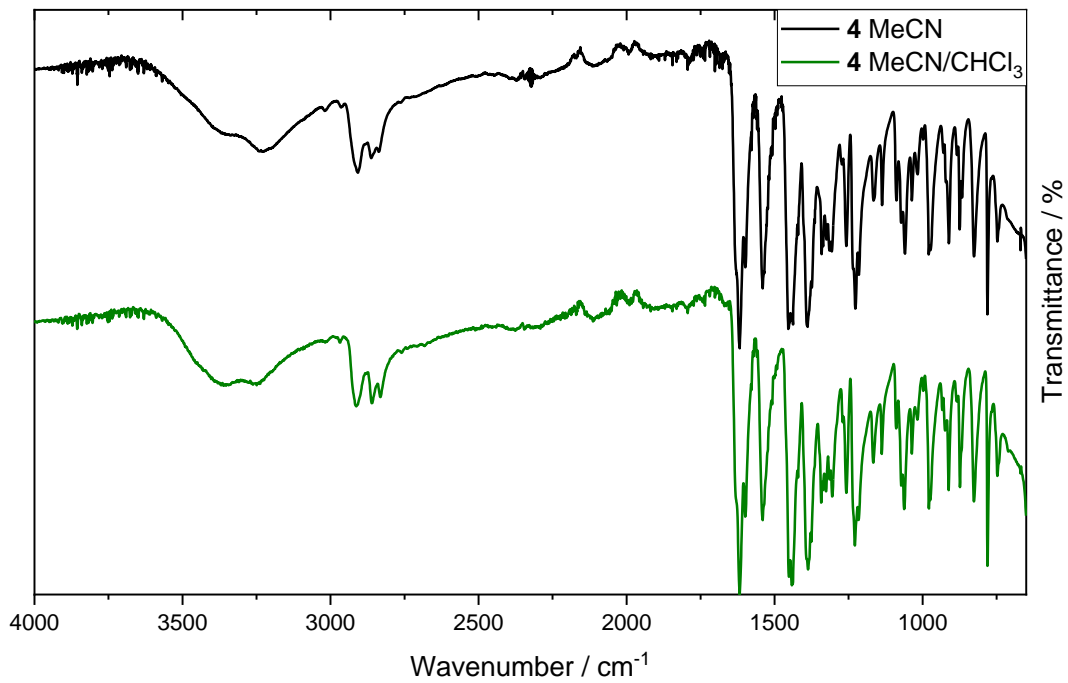

**Figure S51** Comparison of IR spectra of **4** prepared from MeCN or MeCN/ $\text{CHCl}_3$

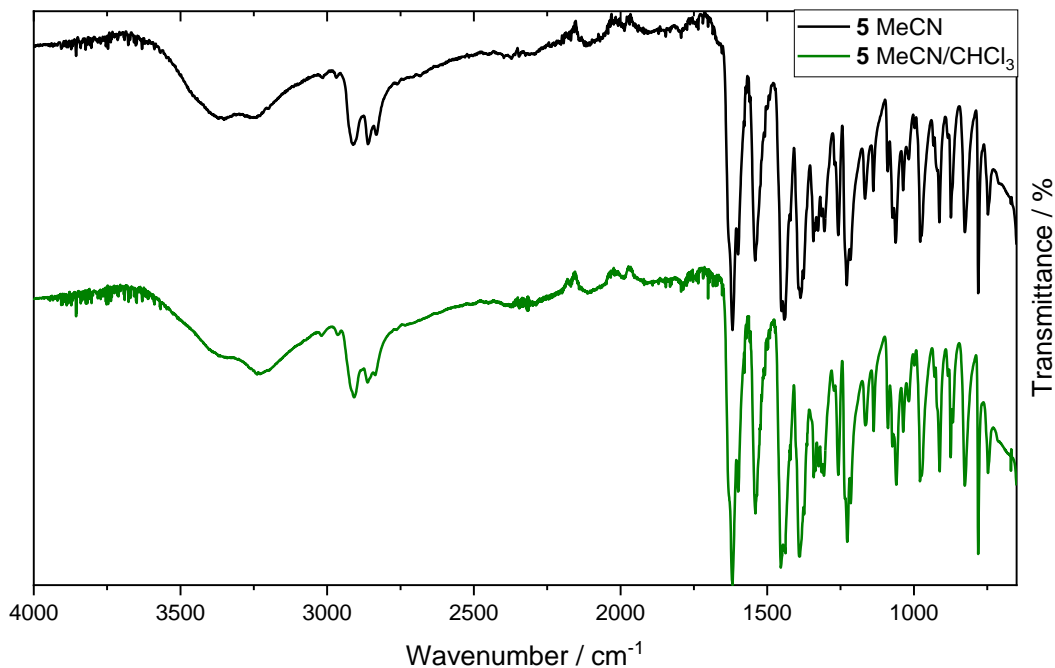

**Figure S52** Comparison of IR spectra of **5** prepared from MeCN or MeCN/CHCl<sub>3</sub>.

1. H. E. Gottlieb, V. Kotlyar and A. Nudelman, *J Org Chem*, 1997, **62**, 7512-7515.
2. B. M. Flanagan, P. V. Bernhardt, E. R. Krausz, S. R. Luthi and M. J. Riley, *Inorg Chem*, 2002, **41**, 5024-5033.
3. B. M. Flanagan, P. V. Bernhardt, E. R. Krausz, S. R. Luthi and M. J. Riley, *Inorg Chem*, 2001, **40**, 5401-5407.
4. K. S. Pedersen, J. Dreiser, H. Weihe, R. Sibille, H. V. Johannesen, M. A. Sorensen, B. E. Nielsen, M. Sigrist, H. Mutka, S. Rols, J. Bendix and S. Piligkos, *Inorg Chem*, 2015, **54**, 7600-7606.
5. A. Abragam and B. Bleaney, *Electron Paramagnetic Resonance of Transition Ions*, Dover, 1986.
6. in *Handbook on the Physics and Chemistry of Rare Earths*, Elsevier, 1996, vol. 23, ch. 155.
